# Supplementary material for: Suitable commercial catalysts for the synthesis of oxymethylene dimethyl ethers
Source: Royal Society of Chemistry journal article supplement (doi:10.1039/d2re00508e), 2023-01-01
Supplement: d2re00508e1.pdf [file d2re00508e1.pdf]

ARTICLE

## Supplementary information on: Suitable commercial catalysts for the synthesis of oxymethylene dimethyl ethers

Franz Mantei, Sebastian Kopp, Anna Holfelder, Elisa Flad, Daniela Kloeters, Matthias Kraume, and Ouda Salem

### 1. Results and discussion

Table S1-Table S14 and Figure S1-Figure S14 list and illustrated the experimental results of the OME synthesis for the two feed mixtures MeOH-pFA and OME<sub>1</sub>-TRI and all investigated catalysts.

#### A15 – MeOH-pFA feed mixture

Table S1: OME synthesis from MeOH-pFA over A15 (conditions: pFA/MeOH = 1.50 g/g, A15/(MeOH+pFA) = 1.0 wt%, 60 °C, 8 bar, batch). The concentrations are presented in mass fractions and the duration in minutes.

| t in min          | 0      | 0      | 1      | 5      | 10     | 15     | 20     | 30     | 45     | 60     | 75     | 90     | 120    | 150    | 180    | 240    | 300    | 1440   |
|-------------------|--------|--------|--------|--------|--------|--------|--------|--------|--------|--------|--------|--------|--------|--------|--------|--------|--------|--------|
| FA                | 0.5862 | 0.5653 | 0.5436 | 0.5143 | 0.4650 | 0.4242 | 0.4182 | 0.3924 | 0.3684 | 0.3681 | 0.3590 | 0.3537 | 0.3602 | 0.3469 | 0.3402 | 0.3446 | 0.3512 | 0.3431 |
| H <sub>2</sub> O  | 0.0238 | 0.0234 | 0.0253 | 0.0315 | 0.0419 | 0.0534 | 0.0557 | 0.0671 | 0.0784 | 0.0805 | 0.0976 | 0.0927 | 0.0944 | 0.0952 | 0.0879 | 0.0868 | 0.0910 | 0.0974 |
| MeOH              | 0.3871 | 0.4076 | 0.4261 | 0.4319 | 0.4218 | 0.4129 | 0.3747 | 0.3479 | 0.3434 | 0.2690 | 0.2455 | 0.2391 | 0.2202 | 0.2264 | 0.2156 | 0.2113 | 0.2080 | 0.2053 |
| OME <sub>1</sub>  | 0.0009 | 0.0013 | 0.0013 | 0.0091 | 0.0301 | 0.0461 | 0.0633 | 0.0799 | 0.0656 | 0.1144 | 0.1189 | 0.1243 | 0.1264 | 0.1122 | 0.1338 | 0.1330 | 0.1277 | 0.1208 |
| OME <sub>2</sub>  | 0.0007 | 0.0010 | 0.0013 | 0.0066 | 0.0216 | 0.0330 | 0.0454 | 0.0574 | 0.0704 | 0.0820 | 0.0855 | 0.0890 | 0.0901 | 0.0934 | 0.0956 | 0.0938 | 0.0896 | 0.0903 |
| OME <sub>3</sub>  | 0.0004 | 0.0005 | 0.0006 | 0.0029 | 0.0098 | 0.0151 | 0.0212 | 0.0271 | 0.0357 | 0.0410 | 0.0439 | 0.0469 | 0.0489 | 0.0555 | 0.0547 | 0.0547 | 0.0534 | 0.0547 |
| OME <sub>4</sub>  | 0.0003 | 0.0003 | 0.0003 | 0.0015 | 0.0051 | 0.0079 | 0.0113 | 0.0146 | 0.0197 | 0.0229 | 0.0251 | 0.0272 | 0.0293 | 0.0342 | 0.0343 | 0.0352 | 0.0354 | 0.0367 |
| OME <sub>5</sub>  | 0.0002 | 0.0001 | 0.0002 | 0.0007 | 0.0023 | 0.0035 | 0.0050 | 0.0066 | 0.0090 | 0.0106 | 0.0118 | 0.0129 | 0.0143 | 0.0169 | 0.0173 | 0.0182 | 0.0189 | 0.0200 |
| OME <sub>6</sub>  | 0.0001 | 0.0001 | 0.0001 | 0.0003 | 0.0011 | 0.0017 | 0.0025 | 0.0033 | 0.0045 | 0.0054 | 0.0060 | 0.0067 | 0.0075 | 0.0090 | 0.0093 | 0.0100 | 0.0107 | 0.0118 |
| OME <sub>7</sub>  | 0.0001 | 0.0000 | 0.0006 | 0.0002 | 0.0006 | 0.0009 | 0.0012 | 0.0016 | 0.0022 | 0.0027 | 0.0030 | 0.0034 | 0.0039 | 0.0046 | 0.0049 | 0.0053 | 0.0058 | 0.0067 |
| OME <sub>8</sub>  | 0.0000 | 0.0000 | 0.0003 | 0.0005 | 0.0003 | 0.0004 | 0.0006 | 0.0008 | 0.0011 | 0.0014 | 0.0015 | 0.0017 | 0.0020 | 0.0024 | 0.0025 | 0.0028 | 0.0031 | 0.0038 |
| OME <sub>9</sub>  | 0.0000 | 0.0000 | 0.0000 | 0.0000 | 0.0000 | 0.0002 | 0.0003 | 0.0004 | 0.0006 | 0.0007 | 0.0008 | 0.0009 | 0.0010 | 0.0012 | 0.0013 | 0.0015 | 0.0017 | 0.0022 |
| OME <sub>10</sub> | 0.0000 | 0.0000 | 0.0000 | 0.0000 | 0.0000 | 0.0000 | 0.0000 | 0.0000 | 0.0003 | 0.0004 | 0.0004 | 0.0005 | 0.0005 | 0.0007 | 0.0007 | 0.0008 | 0.0009 | 0.0013 |
| OME <sub>11</sub> | 0.0000 | 0.0000 | 0.0000 | 0.0000 | 0.0000 | 0.0000 | 0.0000 | 0.0000 | 0.0000 | 0.0000 | 0.0000 | 0.0000 | 0.0000 | 0.0000 | 0.0000 | 0.0000 | 0.0000 | 0.0007 |
| TRI               | 0.0000 | 0.0000 | 0.0000 | 0.0000 | 0.0000 | 0.0000 | 0.0000 | 0.0003 | 0.0004 | 0.0005 | 0.0006 | 0.0008 | 0.0010 | 0.0012 | 0.0014 | 0.0018 | 0.0023 | 0.0049 |
| MEFO              | 0.0004 | 0.0004 | 0.0004 | 0.0005 | 0.0006 | 0.0006 | 0.0006 | 0.0006 | 0.0006 | 0.0003 | 0.0005 | 0.0005 | 0.0004 | 0.0004 | 0.0002 | 0.0004 | 0.0003 | 0.0003 |

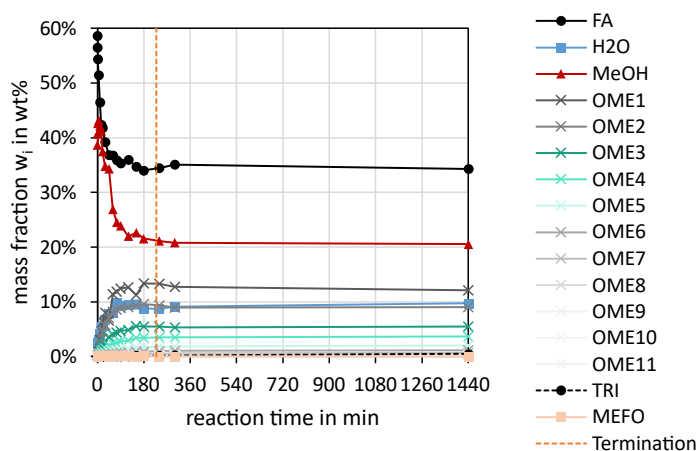

Figure S1 - OME synthesis from MeOH-pFA over A15 (conditions: pFA/MeOH = 1.50 g/g, A15/(MeOH+pFA) = 1.0 wt%, 60 °C, 8 bar, batch). The termination time represents the time after which 90 % of the OME<sub>5</sub> concentration after 24 h are obtained.

## A36 – MeOH-pFA feed mixture

Table S2: OME synthesis from MeOH-pFA over A36 (conditions: pFA/MeOH = 1.53 g/g, A36/(MeOH+pFA) = 1.0 wt%, 60 °C, 8 bar, batch). The concentrations are presented in mass fractions and the duration in minutes.

| T in min          | 0      | 0      | 1      | 5      | 10     | 15     | 20     | 30     | 45     | 60     | 75     | 90     | 120    | 150    | 180    | 240    | 300    | 1440   |
|-------------------|--------|--------|--------|--------|--------|--------|--------|--------|--------|--------|--------|--------|--------|--------|--------|--------|--------|--------|
| FA                | 0.5837 | 0.5892 | 0.5457 | 0.5197 | 0.4905 | 0.4692 | 0.4521 | 0.4296 | 0.4057 | 0.3921 | 0.3850 | 0.3783 | 0.3714 | 0.3631 | 0.3623 | 0.3571 | 0.3540 | 0.3452 |
| H <sub>2</sub> O  | 0.0236 | 0.0255 | 0.0356 | 0.0468 | 0.0553 | 0.0646 | 0.0665 | 0.0697 | 0.0776 | 0.0780 | 0.0826 | 0.0828 | 0.0853 | 0.0849 | 0.0858 | 0.0861 | 0.0901 | 0.0861 |
| MeOH              | 0.3902 | 0.3830 | 0.3733 | 0.3563 | 0.3375 | 0.3096 | 0.2930 | 0.2657 | 0.2378 | 0.2197 | 0.2012 | 0.2010 | 0.1942 | 0.1916 | 0.1868 | 0.1880 | 0.1870 | 0.1639 |
| OME <sub>1</sub>  | 0.0007 | 0.0006 | 0.0209 | 0.0355 | 0.0521 | 0.0696 | 0.0829 | 0.1013 | 0.1181 | 0.1281 | 0.1342 | 0.1353 | 0.1361 | 0.1379 | 0.1376 | 0.1375 | 0.1324 | 0.1450 |
| OME <sub>2</sub>  | 0.0006 | 0.0005 | 0.0138 | 0.0235 | 0.0361 | 0.0476 | 0.0570 | 0.0703 | 0.0823 | 0.0904 | 0.0951 | 0.0956 | 0.0966 | 0.0978 | 0.0975 | 0.0963 | 0.0957 | 0.1016 |
| OME <sub>3</sub>  | 0.0003 | 0.0002 | 0.0058 | 0.0099 | 0.0157 | 0.0213 | 0.0260 | 0.0331 | 0.0402 | 0.0459 | 0.0498 | 0.0514 | 0.0541 | 0.0563 | 0.0573 | 0.0573 | 0.0582 | 0.0604 |
| OME <sub>4</sub>  | 0.0001 | 0.0001 | 0.0025 | 0.0046 | 0.0074 | 0.0103 | 0.0129 | 0.0170 | 0.0213 | 0.0250 | 0.0279 | 0.0294 | 0.0322 | 0.0346 | 0.0361 | 0.0371 | 0.0385 | 0.0398 |
| OME <sub>5</sub>  | 0.0001 | 0.0001 | 0.0009 | 0.0017 | 0.0028 | 0.0040 | 0.0051 | 0.0069 | 0.0089 | 0.0108 | 0.0123 | 0.0132 | 0.0149 | 0.0165 | 0.0175 | 0.0187 | 0.0197 | 0.0211 |
| OME <sub>6</sub>  | 0.0000 | 0.0000 | 0.0004 | 0.0007 | 0.0012 | 0.0017 | 0.0022 | 0.0030 | 0.0040 | 0.0049 | 0.0057 | 0.0062 | 0.0072 | 0.0081 | 0.0088 | 0.0098 | 0.0106 | 0.0119 |
| OME <sub>7</sub>  | 0.0000 | 0.0000 | 0.0002 | 0.0003 | 0.0005 | 0.0007 | 0.0010 | 0.0013 | 0.0018 | 0.0022 | 0.0026 | 0.0028 | 0.0034 | 0.0039 | 0.0043 | 0.0049 | 0.0054 | 0.0066 |
| OME <sub>8</sub>  | 0.0000 | 0.0000 | 0.0000 | 0.0002 | 0.0002 | 0.0003 | 0.0004 | 0.0006 | 0.0008 | 0.0010 | 0.0012 | 0.0013 | 0.0016 | 0.0019 | 0.0021 | 0.0024 | 0.0027 | 0.0036 |
| OME <sub>9</sub>  | 0.0000 | 0.0000 | 0.0000 | 0.0000 | 0.0000 | 0.0002 | 0.0002 | 0.0003 | 0.0004 | 0.0005 | 0.0006 | 0.0007 | 0.0008 | 0.0009 | 0.0011 | 0.0013 | 0.0014 | 0.0021 |
| OME <sub>10</sub> | 0.0000 | 0.0000 | 0.0000 | 0.0000 | 0.0000 | 0.0000 | 0.0000 | 0.0000 | 0.0000 | 0.0000 | 0.0003 | 0.0003 | 0.0004 | 0.0005 | 0.0006 | 0.0007 | 0.0008 | 0.0012 |
| OME <sub>11</sub> | 0.0000 | 0.0000 | 0.0000 | 0.0000 | 0.0000 | 0.0000 | 0.0000 | 0.0000 | 0.0000 | 0.0000 | 0.0000 | 0.0000 | 0.0000 | 0.0000 | 0.0000 | 0.0000 | 0.0000 | 0.0008 |
| TRI               | 0.0000 | 0.0000 | 0.0000 | 0.0000 | 0.0000 | 0.0000 | 0.0000 | 0.0004 | 0.0005 | 0.0007 | 0.0008 | 0.0010 | 0.0012 | 0.0015 | 0.0018 | 0.0023 | 0.0029 | 0.0102 |
| MEFO              | 0.0008 | 0.0007 | 0.0008 | 0.0008 | 0.0008 | 0.0008 | 0.0008 | 0.0008 | 0.0008 | 0.0008 | 0.0008 | 0.0007 | 0.0007 | 0.0006 | 0.0006 | 0.0006 | 0.0006 | 0.0007 |

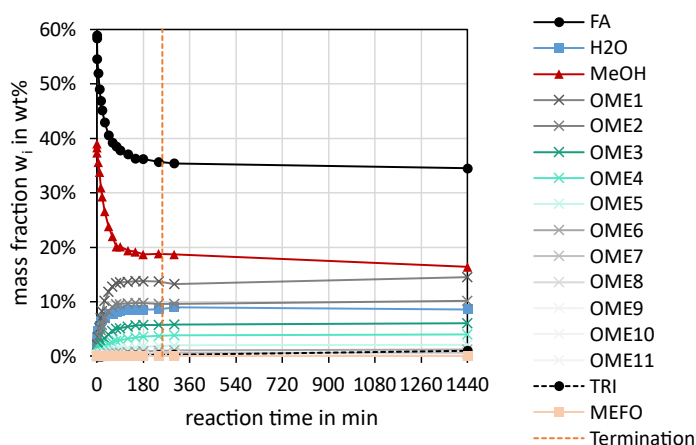

Figure S2 - OME synthesis from MeOH-pFA over A36 (conditions: pFA/MeOH = 1.53 g/g, A36/(MeOH+pFA) = 1.0 wt%, 60 °C, 8 bar, batch). The termination time represents the time after which 90 % of the OME<sub>5</sub> concentration after 24 h are obtained.

## A46 – MeOH-pFA feed mixture

Table S3: OME synthesis from MeOH-pFA over A46 (conditions: pFA/MeOH = 1.50 g/g, A46/(MeOH+pFA) = 1.0 wt%, 60 °C, 8 bar, batch). The concentrations are presented in mass fractions and the duration in minutes.

| t in min          | 0      | 0      | 1      | 5      | 10     | 15     | 20     | 30     | 45     | 60     | 75     | 90     | 120    | 150    | 180    | 240    | 300    | 1440   |
|-------------------|--------|--------|--------|--------|--------|--------|--------|--------|--------|--------|--------|--------|--------|--------|--------|--------|--------|--------|
| FA                | 0.5711 | 0.5675 | 0.5508 | 0.5157 | 0.4828 | 0.4562 | 0.4237 | 0.4110 | 0.3857 | 0.3760 | 0.3617 | 0.3549 | 0.3444 | 0.3453 | 0.3426 | 0.3399 | 0.3373 | 0.3250 |
| H <sub>2</sub> O  | 0.0219 | 0.0265 | 0.0294 | 0.0373 | 0.0492 | 0.0620 | 0.0666 | 0.0748 | 0.0857 | 0.0870 | 0.0875 | 0.0842 | 0.0825 | 0.0701 | 0.0961 | 0.0938 | 0.0955 | 0.0869 |
| MeOH              | 0.4046 | 0.4030 | 0.4053 | 0.3925 | 0.3725 | 0.3466 | 0.3332 | 0.2879 | 0.2664 | 0.2279 | 0.2327 | 0.2247 | 0.1580 | 0.1512 | 0.1553 | 0.1536 | 0.1512 | 0.1480 |
| OME <sub>1</sub>  | 0.0007 | 0.0008 | 0.0059 | 0.0227 | 0.0397 | 0.0550 | 0.0722 | 0.0917 | 0.1057 | 0.1210 | 0.1250 | 0.1305 | 0.1572 | 0.1626 | 0.1555 | 0.1563 | 0.1563 | 0.1623 |
| OME <sub>2</sub>  | 0.0007 | 0.0008 | 0.0046 | 0.0172 | 0.0299 | 0.0420 | 0.0543 | 0.0686 | 0.0779 | 0.0902 | 0.0915 | 0.0954 | 0.1086 | 0.1168 | 0.1085 | 0.1082 | 0.1078 | 0.1113 |
| OME <sub>3</sub>  | 0.0003 | 0.0004 | 0.0020 | 0.0077 | 0.0137 | 0.0197 | 0.0259 | 0.0337 | 0.0393 | 0.0476 | 0.0488 | 0.0520 | 0.0663 | 0.0677 | 0.0628 | 0.0635 | 0.0636 | 0.0661 |
| OME <sub>4</sub>  | 0.0001 | 0.0003 | 0.0009 | 0.0037 | 0.0068 | 0.0101 | 0.0134 | 0.0179 | 0.0215 | 0.0269 | 0.0280 | 0.0305 | 0.0412 | 0.0427 | 0.0395 | 0.0411 | 0.0418 | 0.0440 |
| OME <sub>5</sub>  | 0.0001 | 0.0002 | 0.0004 | 0.0015 | 0.0028 | 0.0042 | 0.0056 | 0.0076 | 0.0094 | 0.0121 | 0.0128 | 0.0142 | 0.0204 | 0.0214 | 0.0195 | 0.0209 | 0.0218 | 0.0237 |
| OME <sub>6</sub>  | 0.0001 | 0.0001 | 0.0002 | 0.0007 | 0.0013 | 0.0019 | 0.0025 | 0.0035 | 0.0044 | 0.0058 | 0.0062 | 0.0070 | 0.0108 | 0.0112 | 0.0101 | 0.0112 | 0.0120 | 0.0137 |
| OME <sub>7</sub>  | 0.0000 | 0.0001 | 0.0001 | 0.0003 | 0.0006 | 0.0009 | 0.0011 | 0.0016 | 0.0020 | 0.0027 | 0.0029 | 0.0033 | 0.0054 | 0.0055 | 0.0050 | 0.0057 | 0.0062 | 0.0076 |
| OME <sub>8</sub>  | 0.0000 | 0.0000 | 0.0000 | 0.0001 | 0.0003 | 0.0004 | 0.0005 | 0.0007 | 0.0010 | 0.0013 | 0.0014 | 0.0016 | 0.0026 | 0.0027 | 0.0025 | 0.0029 | 0.0032 | 0.0042 |
| OME <sub>9</sub>  | 0.0000 | 0.0000 | 0.0000 | 0.0000 | 0.0000 | 0.0002 | 0.0003 | 0.0004 | 0.0005 | 0.0006 | 0.0007 | 0.0008 | 0.0013 | 0.0014 | 0.0013 | 0.0015 | 0.0017 | 0.0023 |
| OME <sub>10</sub> | 0.0000 | 0.0000 | 0.0000 | 0.0000 | 0.0000 | 0.0000 | 0.0000 | 0.0000 | 0.0000 | 0.0003 | 0.0004 | 0.0004 | 0.0006 | 0.0007 | 0.0007 | 0.0008 | 0.0009 | 0.0013 |
| OME <sub>11</sub> | 0.0000 | 0.0000 | 0.0000 | 0.0000 | 0.0000 | 0.0000 | 0.0000 | 0.0000 | 0.0000 | 0.0000 | 0.0000 | 0.0000 | 0.0000 | 0.0000 | 0.0000 | 0.0000 | 0.0000 | 0.0008 |
| TRI               | 0.0000 | 0.0000 | 0.0000 | 0.0000 | 0.0000 | 0.0000 | 0.0000 | 0.0000 | 0.0000 | 0.0000 | 0.0000 | 0.0000 | 0.0000 | 0.0000 | 0.0000 | 0.0000 | 0.0000 | 0.0020 |
| MEFO              | 0.0005 | 0.0005 | 0.0005 | 0.0006 | 0.0006 | 0.0006 | 0.0007 | 0.0007 | 0.0006 | 0.0006 | 0.0006 | 0.0006 | 0.0007 | 0.0007 | 0.0006 | 0.0006 | 0.0006 | 0.0007 |

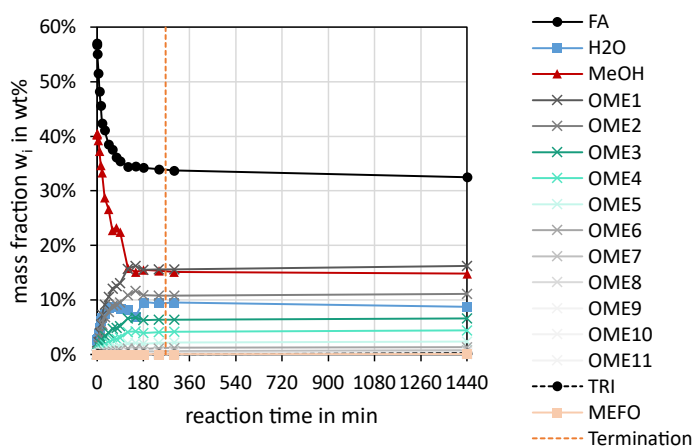

Figure S3 - OME synthesis from MeOH-pFA over A46 (conditions: pFA/MeOH = 1.50 g/g, A46/(MeOH+pFA) = 1.0 wt%, 60 °C, 8 bar, batch). The termination time represents the time after which 90 % of the OME<sub>5</sub> concentration after 24 h are obtained.

## Dowex – MeOH-pFA feed mixture

Table S4: OME synthesis from MeOH-pFA over Dowex (conditions: pFA/MeOH = 1.50 g/g, Dowex/(MeOH+pFA) = 1.0 wt%, 60 °C, 8 bar, batch). The concentrations are presented in mass fractions and the duration in minutes.

| t in min          | 0      | 0      | 1      | 5      | 10     | 15     | 20     | 30     | 45     | 60     | 75     | 90     | 120    | 150    | 180    | 240    | 300    |
|-------------------|--------|--------|--------|--------|--------|--------|--------|--------|--------|--------|--------|--------|--------|--------|--------|--------|--------|
| FA                | 0.5652 | 0.5591 | 0.4365 | 0.3962 | 0.3728 | 0.3622 | 0.3564 | 0.3502 | 0.3466 | 0.3431 | 0.3426 | 0.3399 | 0.3396 | 0.3372 | 0.3376 | 0.3382 | 0.3370 |
| H <sub>2</sub> O  | 0.0255 | 0.0257 | 0.0690 | 0.0799 | 0.0811 | 0.0854 | 0.0854 | 0.0887 | 0.0870 | 0.0916 | 0.0916 | 0.0901 | 0.0909 | 0.0908 | 0.0887 | 0.0889 | 0.0856 |
| MeOH              | 0.3906 | 0.3814 | 0.1687 | 0.1441 | 0.1227 | 0.1033 | 0.1082 | 0.1065 | 0.1077 | 0.1011 | 0.1018 | 0.1059 | 0.1146 | 0.1049 | 0.1055 | 0.1066 | 0.1068 |
| OME <sub>1</sub>  | 0.0056 | 0.0108 | 0.1203 | 0.1453 | 0.1594 | 0.1684 | 0.1674 | 0.1687 | 0.1690 | 0.1695 | 0.1685 | 0.1691 | 0.1665 | 0.1723 | 0.1706 | 0.1692 | 0.1706 |
| OME <sub>2</sub>  | 0.0054 | 0.0098 | 0.0994 | 0.1138 | 0.1225 | 0.1269 | 0.1251 | 0.1232 | 0.1214 | 0.1205 | 0.1191 | 0.1184 | 0.1162 | 0.1191 | 0.1189 | 0.1183 | 0.1194 |
| OME <sub>3</sub>  | 0.0029 | 0.0052 | 0.0512 | 0.0581 | 0.0647 | 0.0689 | 0.0694 | 0.0700 | 0.0706 | 0.0713 | 0.0711 | 0.0707 | 0.0687 | 0.0704 | 0.0708 | 0.0706 | 0.0713 |
| OME <sub>4</sub>  | 0.0015 | 0.0029 | 0.0281 | 0.0325 | 0.0375 | 0.0409 | 0.0420 | 0.0435 | 0.0450 | 0.0465 | 0.0470 | 0.0470 | 0.0454 | 0.0464 | 0.0472 | 0.0471 | 0.0475 |
| OME <sub>5</sub>  | 0.0007 | 0.0014 | 0.0132 | 0.0151 | 0.0177 | 0.0197 | 0.0205 | 0.0217 | 0.0230 | 0.0243 | 0.0250 | 0.0251 | 0.0243 | 0.0246 | 0.0253 | 0.0253 | 0.0254 |
| OME <sub>6</sub>  | 0.0004 | 0.0008 | 0.0067 | 0.0077 | 0.0091 | 0.0103 | 0.0108 | 0.0117 | 0.0126 | 0.0137 | 0.0143 | 0.0144 | 0.0142 | 0.0141 | 0.0146 | 0.0147 | 0.0148 |
| OME <sub>7</sub>  | 0.0002 | 0.0004 | 0.0032 | 0.0036 | 0.0043 | 0.0048 | 0.0051 | 0.0056 | 0.0061 | 0.0068 | 0.0073 | 0.0074 | 0.0077 | 0.0073 | 0.0076 | 0.0077 | 0.0077 |
| OME <sub>8</sub>  | 0.0000 | 0.0002 | 0.0015 | 0.0016 | 0.0019 | 0.0022 | 0.0023 | 0.0025 | 0.0028 | 0.0031 | 0.0034 | 0.0035 | 0.0039 | 0.0036 | 0.0037 | 0.0038 | 0.0038 |
| OME <sub>9</sub>  | 0.0000 | 0.0000 | 0.0000 | 0.0000 | 0.0000 | 0.0010 | 0.0010 | 0.0011 | 0.0013 | 0.0015 | 0.0016 | 0.0017 | 0.0021 | 0.0018 | 0.0019 | 0.0019 | 0.0019 |
| OME <sub>10</sub> | 0.0000 | 0.0000 | 0.0000 | 0.0000 | 0.0000 | 0.0000 | 0.0000 | 0.0000 | 0.0005 | 0.0007 | 0.0007 | 0.0008 | 0.0010 | 0.0009 | 0.0009 | 0.0009 | 0.0009 |
| OME <sub>11</sub> | 0.0000 | 0.0000 | 0.0000 | 0.0000 | 0.0000 | 0.0000 | 0.0000 | 0.0000 | 0.0000 | 0.0000 | 0.0000 | 0.0000 | 0.0000 | 0.0000 | 0.0000 | 0.0000 | 0.0000 |
| TRI               | 0.0000 | 0.0000 | 0.0000 | 0.0000 | 0.0000 | 0.0000 | 0.0000 | 0.0000 | 0.0000 | 0.0000 | 0.0000 | 0.0000 | 0.0000 | 0.0005 | 0.0006 | 0.0009 | 0.0012 |
| MEFO              | 0.0022 | 0.0021 | 0.0023 | 0.0023 | 0.0062 | 0.0060 | 0.0063 | 0.0065 | 0.0064 | 0.0063 | 0.0060 | 0.0061 | 0.0050 | 0.0061 | 0.0062 | 0.0061 | 0.0062 |

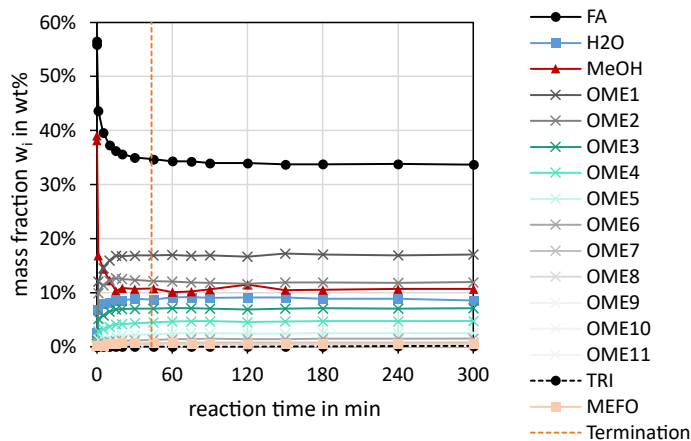

Figure S4 - OME synthesis from MeOH-pFA over Dowex (conditions: pFA/MeOH = 1.50 g/g, Dowex/(MeOH+pFA) = 1.0 wt%, 60 °C, 8 bar, batch). The termination time represents the time after which 90 % of the OME<sub>5</sub> concentration after 24 h are obtained.

## H-BEA 25 – MeOH-pFA feed mixture

Table S5: OME synthesis from MeOH-pFA over H-BEA 25 (conditions: pFA/MeOH = 1.50 g/g, H-BEA 25/(MeOH+pFA) = 1.0 wt%, 60 °C, 8 bar, batch). The concentrations are presented in mass fractions and the duration in minutes.

| t in min          | 0      | 0      | 1      | 5      | 10     | 15     | 20     | 30     | 45     | 60     | 75     | 90     | 120    | 150    | 180    | 240    | 300    | 1440   |
|-------------------|--------|--------|--------|--------|--------|--------|--------|--------|--------|--------|--------|--------|--------|--------|--------|--------|--------|--------|
| FA                | 0.5911 | 0.5873 | 0.5959 | 0.5846 | 0.5755 | 0.5742 | 0.5619 | 0.5604 | 0.5487 | 0.5323 | 0.5258 | 0.5109 | 0.4937 | 0.4846 | 0.4681 | 0.4423 | 0.4228 | 0.3509 |
| H <sub>2</sub> O  | 0.0218 | 0.0243 | 0.0242 | 0.0281 | 0.0273 | 0.0324 | 0.0331 | 0.0366 | 0.0411 | 0.0426 | 0.0426 | 0.0491 | 0.0491 | 0.0513 | 0.0592 | 0.0673 | 0.0737 | 0.0910 |
| MeOH              | 0.3839 | 0.3814 | 0.3744 | 0.3764 | 0.3793 | 0.3682 | 0.3631 | 0.3567 | 0.3486 | 0.3462 | 0.3389 | 0.3294 | 0.3167 | 0.3041 | 0.2909 | 0.2484 | 0.2444 | 0.1540 |
| OME <sub>1</sub>  | 0.0010 | 0.0023 | 0.0019 | 0.0039 | 0.0064 | 0.0090 | 0.0148 | 0.0165 | 0.0219 | 0.0278 | 0.0345 | 0.0408 | 0.0477 | 0.0521 | 0.0626 | 0.0869 | 0.0951 | 0.1552 |
| OME <sub>2</sub>  | 0.0007 | 0.0017 | 0.0015 | 0.0033 | 0.0057 | 0.0080 | 0.0134 | 0.0149 | 0.0197 | 0.0252 | 0.0302 | 0.0355 | 0.0430 | 0.0473 | 0.0534 | 0.0710 | 0.0744 | 0.1050 |
| OME <sub>3</sub>  | 0.0003 | 0.0008 | 0.0006 | 0.0013 | 0.0023 | 0.0033 | 0.0056 | 0.0062 | 0.0084 | 0.0109 | 0.0125 | 0.0151 | 0.0205 | 0.0237 | 0.0262 | 0.0345 | 0.0366 | 0.0585 |
| OME <sub>4</sub>  | 0.0001 | 0.0004 | 0.0003 | 0.0007 | 0.0013 | 0.0019 | 0.0033 | 0.0037 | 0.0051 | 0.0067 | 0.0072 | 0.0089 | 0.0133 | 0.0162 | 0.0175 | 0.0224 | 0.0237 | 0.0376 |
| OME <sub>5</sub>  | 0.0001 | 0.0002 | 0.0001 | 0.0003 | 0.0006 | 0.0010 | 0.0017 | 0.0019 | 0.0026 | 0.0034 | 0.0036 | 0.0045 | 0.0071 | 0.0090 | 0.0097 | 0.0120 | 0.0127 | 0.0199 |
| OME <sub>6</sub>  | 0.0001 | 0.0003 | 0.0001 | 0.0002 | 0.0003 | 0.0005 | 0.0009 | 0.0010 | 0.0014 | 0.0018 | 0.0018 | 0.0023 | 0.0039 | 0.0051 | 0.0055 | 0.0066 | 0.0070 | 0.0114 |
| OME <sub>7</sub>  | 0.0000 | 0.0001 | 0.0000 | 0.0001 | 0.0002 | 0.0002 | 0.0004 | 0.0005 | 0.0006 | 0.0009 | 0.0009 | 0.0011 | 0.0019 | 0.0026 | 0.0028 | 0.0034 | 0.0038 | 0.0062 |
| OME <sub>8</sub>  | 0.0000 | 0.0000 | 0.0000 | 0.0000 | 0.0001 | 0.0001 | 0.0002 | 0.0002 | 0.0003 | 0.0004 | 0.0005 | 0.0006 | 0.0010 | 0.0014 | 0.0015 | 0.0018 | 0.0021 | 0.0034 |
| OME <sub>9</sub>  | 0.0000 | 0.0000 | 0.0000 | 0.0000 | 0.0000 | 0.0000 | 0.0001 | 0.0001 | 0.0002 | 0.0002 | 0.0002 | 0.0003 | 0.0005 | 0.0008 | 0.0009 | 0.0010 | 0.0012 | 0.0019 |
| OME <sub>10</sub> | 0.0000 | 0.0000 | 0.0000 | 0.0000 | 0.0000 | 0.0000 | 0.0000 | 0.0000 | 0.0000 | 0.0000 | 0.0000 | 0.0002 | 0.0003 | 0.0005 | 0.0005 | 0.0006 | 0.0007 | 0.0011 |
| OME <sub>11</sub> | 0.0000 | 0.0000 | 0.0000 | 0.0000 | 0.0000 | 0.0000 | 0.0000 | 0.0000 | 0.0000 | 0.0000 | 0.0000 | 0.0000 | 0.0000 | 0.0000 | 0.0000 | 0.0000 | 0.0000 | 0.0007 |
| TRI               | 0.0000 | 0.0000 | 0.0000 | 0.0000 | 0.0000 | 0.0000 | 0.0000 | 0.0000 | 0.0000 | 0.0000 | 0.0000 | 0.0000 | 0.0000 | 0.0000 | 0.0000 | 0.0000 | 0.0003 | 0.0013 |
| MEFO              | 0.0010 | 0.0011 | 0.0011 | 0.0011 | 0.0012 | 0.0011 | 0.0015 | 0.0013 | 0.0015 | 0.0016 | 0.0015 | 0.0014 | 0.0014 | 0.0013 | 0.0014 | 0.0017 | 0.0016 | 0.0020 |

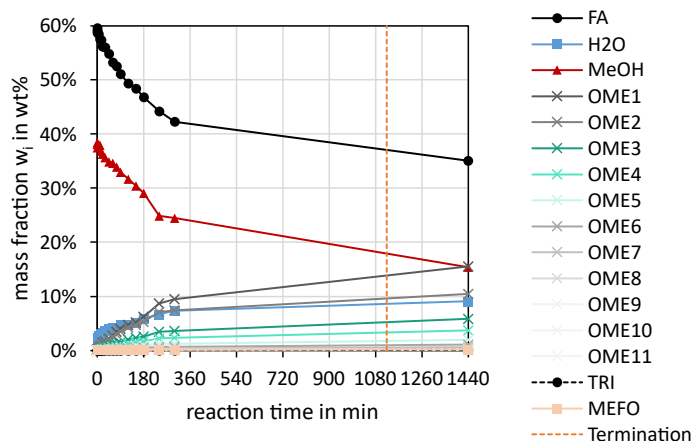

Figure S5 - OME synthesis from MeOH-pFA over H-BEA 25 (conditions: pFA/MeOH = 1.50 g/g, H-BEA 25/(MeOH+pFA) = 1.0 wt%, 60 °C, 8 bar, batch). The termination time represents the time after which 90 % of the OME<sub>5</sub> concentration after 24 h are obtained.

## H-MFI 90 – MeOH-pFA feed mixture

Table S6: OME synthesis from MeOH-pFA over H-MFI 90 (conditions: pFA/MeOH = 1.50 g/g, H-MFI 90/(MeOH+pFA) = 1.0 wt%, 60 °C, 8 bar, batch). The concentrations are presented in mass fractions and the duration in minutes.

| t in min          | 0      | 0      | 1      | 5      | 10     | 15     | 20     | 30     | 45     | 60     | 75     | 90     | 120    | 150    | 180    | 240    | 300    | 1440   |
|-------------------|--------|--------|--------|--------|--------|--------|--------|--------|--------|--------|--------|--------|--------|--------|--------|--------|--------|--------|
| FA                | 0.5592 | 0.5558 | 0.5543 | 0.5563 | 0.5468 | 0.5386 | 0.5347 | 0.5222 | 0.5040 | 0.4697 | 0.4688 | 0.4632 | 0.4347 | 0.4181 | 0.4048 | 0.3893 | 0.3608 | 0.2755 |
| H <sub>2</sub> O  | 0.0237 | 0.0269 | 0.0292 | 0.0286 | 0.0318 | 0.0314 | 0.0363 | 0.0362 | 0.0434 | 0.0460 | 0.0527 | 0.0529 | 0.0603 | 0.0641 | 0.0719 | 0.0764 | 0.0836 | 0.0915 |
| MeOH              | 0.4151 | 0.4144 | 0.4121 | 0.4068 | 0.4069 | 0.4052 | 0.3975 | 0.3955 | 0.3831 | 0.3876 | 0.3599 | 0.3448 | 0.3254 | 0.2971 | 0.2732 | 0.2309 | 0.1832 | 0.1343 |
| OME <sub>1</sub>  | 0.0006 | 0.0007 | 0.0014 | 0.0030 | 0.0055 | 0.0095 | 0.0121 | 0.0178 | 0.0268 | 0.0372 | 0.0459 | 0.0541 | 0.0699 | 0.0837 | 0.0949 | 0.1141 | 0.1409 | 0.2001 |
| OME <sub>2</sub>  | 0.0004 | 0.0006 | 0.0011 | 0.0023 | 0.0042 | 0.0074 | 0.0094 | 0.0138 | 0.0207 | 0.0287 | 0.0351 | 0.0410 | 0.0525 | 0.0625 | 0.0698 | 0.0824 | 0.1002 | 0.1269 |
| OME <sub>3</sub>  | 0.0002 | 0.0004 | 0.0004 | 0.0009 | 0.0016 | 0.0028 | 0.0036 | 0.0054 | 0.0082 | 0.0116 | 0.0144 | 0.0170 | 0.0221 | 0.0269 | 0.0307 | 0.0375 | 0.0475 | 0.0694 |
| OME <sub>4</sub>  | 0.0001 | 0.0002 | 0.0003 | 0.0006 | 0.0012 | 0.0021 | 0.0027 | 0.0040 | 0.0062 | 0.0088 | 0.0109 | 0.0127 | 0.0164 | 0.0199 | 0.0224 | 0.0269 | 0.0343 | 0.0422 |
| OME <sub>5</sub>  | 0.0000 | 0.0001 | 0.0001 | 0.0003 | 0.0006 | 0.0010 | 0.0013 | 0.0019 | 0.0030 | 0.0043 | 0.0053 | 0.0062 | 0.0080 | 0.0097 | 0.0111 | 0.0134 | 0.0177 | 0.0206 |
| OME <sub>6</sub>  | 0.0000 | 0.0001 | 0.0001 | 0.0002 | 0.0003 | 0.0005 | 0.0006 | 0.0009 | 0.0014 | 0.0021 | 0.0026 | 0.0030 | 0.0039 | 0.0048 | 0.0056 | 0.0068 | 0.0096 | 0.0108 |
| OME <sub>7</sub>  | 0.0000 | 0.0000 | 0.0000 | 0.0001 | 0.0002 | 0.0003 | 0.0004 | 0.0005 | 0.0008 | 0.0012 | 0.0014 | 0.0017 | 0.0022 | 0.0027 | 0.0031 | 0.0037 | 0.0053 | 0.0054 |
| OME <sub>8</sub>  | 0.0000 | 0.0000 | 0.0000 | 0.0000 | 0.0000 | 0.0001 | 0.0002 | 0.0003 | 0.0004 | 0.0006 | 0.0007 | 0.0009 | 0.0011 | 0.0014 | 0.0016 | 0.0020 | 0.0028 | 0.0028 |
| OME <sub>9</sub>  | 0.0000 | 0.0000 | 0.0000 | 0.0000 | 0.0000 | 0.0000 | 0.0000 | 0.0001 | 0.0002 | 0.0003 | 0.0004 | 0.0005 | 0.0006 | 0.0007 | 0.0009 | 0.0011 | 0.0015 | 0.0015 |
| OME <sub>10</sub> | 0.0000 | 0.0000 | 0.0000 | 0.0000 | 0.0000 | 0.0000 | 0.0000 | 0.0000 | 0.0000 | 0.0000 | 0.0000 | 0.0000 | 0.0003 | 0.0004 | 0.0005 | 0.0006 | 0.0009 | 0.0008 |
| OME <sub>11</sub> | 0.0000 | 0.0000 | 0.0000 | 0.0000 | 0.0000 | 0.0000 | 0.0000 | 0.0000 | 0.0000 | 0.0000 | 0.0000 | 0.0000 | 0.0000 | 0.0000 | 0.0000 | 0.0000 | 0.0000 | 0.0000 |
| TRI               | 0.0000 | 0.0000 | 0.0000 | 0.0000 | 0.0000 | 0.0000 | 0.0000 | 0.0000 | 0.0000 | 0.0000 | 0.0000 | 0.0000 | 0.0000 | 0.0000 | 0.0000 | 0.0000 | 0.0000 | 0.0017 |
| MEFO              | 0.0008 | 0.0008 | 0.0009 | 0.0009 | 0.0010 | 0.0011 | 0.0012 | 0.0013 | 0.0016 | 0.0018 | 0.0020 | 0.0022 | 0.0026 | 0.0079 | 0.0096 | 0.0149 | 0.0119 | 0.0165 |

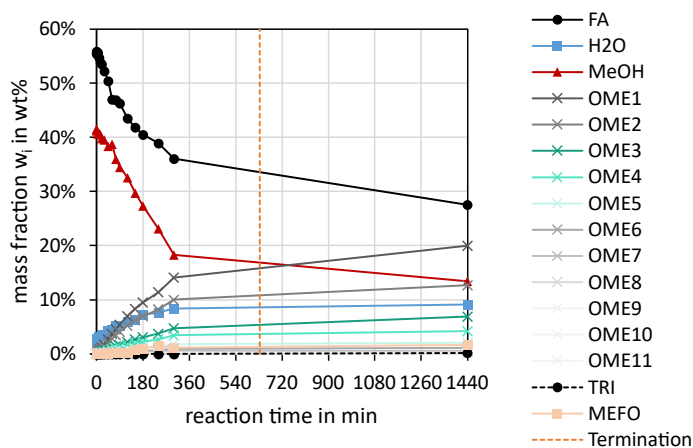

Figure S 6 - OME synthesis from MeOH-pFA over H-MFI 90 (conditions: pFA/MeOH = 1.50 g/g, H-MFI 90/(MeOH+pFA) = 1.0 wt%, 60 °C, 8 bar, batch). The termination time represents the time after which 90 % of the OME<sub>5</sub> concentration after 24 h are obtained.

## Nafion – MeOH-pFA feed mixture

Table S7: OME synthesis from MeOH-pFA over Nafion (conditions: pFA/MeOH = 1.49 g/g, Nafion/(MeOH+pFA) = 1.0 wt%, 60 °C, 8 bar, batch). The concentrations are presented in mass fractions and the duration in minutes.

| t in min          | 0      | 0      | 1      | 5      | 10     | 15     | 20     | 30     | 45     | 60     | 75     | 90     | 120    | 150    | 180    | 240    | 300    | 1440   |        |
|-------------------|--------|--------|--------|--------|--------|--------|--------|--------|--------|--------|--------|--------|--------|--------|--------|--------|--------|--------|--------|
| FA                | 0.5830 | 0.5778 | 0.5786 | 0.5709 | 0.5664 | 0.5540 | 0.5426 | 0.5309 | 0.5130 | 0.4961 | 0.4802 | 0.4664 | 0.4455 | 0.4224 | 0.4091 | 0.3936 | 0.3819 | 0.3530 |        |
| H <sub>2</sub> O  | 0.0233 | 0.0262 | 0.0262 | 0.0290 | 0.0296 | 0.0351 | 0.0372 | 0.0434 | 0.0454 | 0.0543 | 0.0571 | 0.0599 | 0.0639 | 0.0722 | 0.0756 | 0.0792 | 0.0823 | 0.0841 |        |
| MeOH              | 0.3917 | 0.3881 | 0.3866 | 0.3844 | 0.3769 | 0.3739 | 0.3679 | 0.3548 | 0.3455 | 0.3275 | 0.3084 | 0.2932 | 0.2697 | 0.2447 | 0.2360 | 0.2065 | 0.1942 | 0.1716 |        |
| OME <sub>1</sub>  | 0.0005 | 0.0031 | 0.0034 | 0.0067 | 0.0118 | 0.0159 | 0.0224 | 0.0301 | 0.0404 | 0.0509 | 0.0637 | 0.0738 | 0.0890 | 0.1040 | 0.1101 | 0.1246 | 0.1307 | 0.1413 |        |
| OME <sub>2</sub>  | 0.0005 | 0.0025 | 0.0027 | 0.0050 | 0.0085 | 0.0116 | 0.0163 | 0.0221 | 0.0296 | 0.0373 | 0.0468 | 0.0544 | 0.0658 | 0.0769 | 0.0817 | 0.0918 | 0.0961 | 0.1006 |        |
| OME <sub>3</sub>  | 0.0002 | 0.0010 | 0.0011 | 0.0020 | 0.0036 | 0.0051 | 0.0073 | 0.0101 | 0.0139 | 0.0179 | 0.0228 | 0.0269 | 0.0335 | 0.0398 | 0.0431 | 0.0497 | 0.0534 | 0.0603 |        |
| OME <sub>4</sub>  | 0.0001 | 0.0005 | 0.0004 | 0.0009 | 0.0016 | 0.0023 | 0.0033 | 0.0048 | 0.0068 | 0.0089 | 0.0116 | 0.0140 | 0.0179 | 0.0218 | 0.0240 | 0.0286 | 0.0315 | 0.0398 |        |
| OME <sub>5</sub>  | 0.0000 | 0.0002 | 0.0002 | 0.0003 | 0.0006 | 0.0009 | 0.0013 | 0.0018 | 0.0027 | 0.0036 | 0.0048 | 0.0058 | 0.0076 | 0.0095 | 0.0106 | 0.0130 | 0.0147 | 0.0210 |        |
| OME <sub>6</sub>  | 0.0000 | 0.0001 | 0.0001 | 0.0001 | 0.0003 | 0.0004 | 0.0006 | 0.0008 | 0.0012 | 0.0016 | 0.0021 | 0.0026 | 0.0035 | 0.0044 | 0.0050 | 0.0063 | 0.0072 | 0.0118 |        |
| OME <sub>7</sub>  | 0.0000 | 0.0000 | 0.0000 | 0.0000 | 0.0001 | 0.0002 | 0.0002 | 0.0004 | 0.0005 | 0.0007 | 0.0010 | 0.0012 | 0.0016 | 0.0020 | 0.0024 | 0.0030 | 0.0035 | 0.0064 |        |
| OME <sub>8</sub>  | 0.0000 | 0.0000 | 0.0000 | 0.0000 | 0.0000 | 0.0000 | 0.0001 | 0.0002 | 0.0002 | 0.0003 | 0.0005 | 0.0006 | 0.0008 | 0.0010 | 0.0011 | 0.0015 | 0.0017 | 0.0035 |        |
| OME <sub>9</sub>  | 0.0000 | 0.0000 | 0.0000 | 0.0000 | 0.0000 | 0.0000 | 0.0000 | 0.0000 | 0.0000 | 0.0002 | 0.0002 | 0.0003 | 0.0004 | 0.0005 | 0.0006 | 0.0008 | 0.0009 | 0.0020 |        |
| OME <sub>10</sub> | 0.0000 | 0.0000 | 0.0000 | 0.0000 | 0.0000 | 0.0000 | 0.0000 | 0.0000 | 0.0000 | 0.0000 | 0.0000 | 0.0000 | 0.0000 | 0.0000 | 0.0000 | 0.0004 | 0.0005 | 0.0012 |        |
| OME <sub>11</sub> | 0.0000 | 0.0000 | 0.0000 | 0.0000 | 0.0000 | 0.0000 | 0.0000 | 0.0000 | 0.0000 | 0.0000 | 0.0000 | 0.0000 | 0.0000 | 0.0000 | 0.0000 | 0.0000 | 0.0000 | 0.0007 |        |
| TRI               | 0.0000 | 0.0000 | 0.0000 | 0.0000 | 0.0000 | 0.0000 | 0.0000 | 0.0000 | 0.0000 | 0.0000 | 0.0000 | 0.0000 | 0.0000 | 0.0000 | 0.0000 | 0.0004 | 0.0005 | 0.0022 |        |
| MEFO              | 0.0007 | 0.0006 | 0.0006 | 0.0007 | 0.0007 | 0.0007 | 0.0008 | 0.0007 | 0.0008 | 0.0008 | 0.0008 | 0.0008 | 0.0008 | 0.0008 | 0.0008 | 0.0008 | 0.0008 | 0.0007 | 0.0006 |

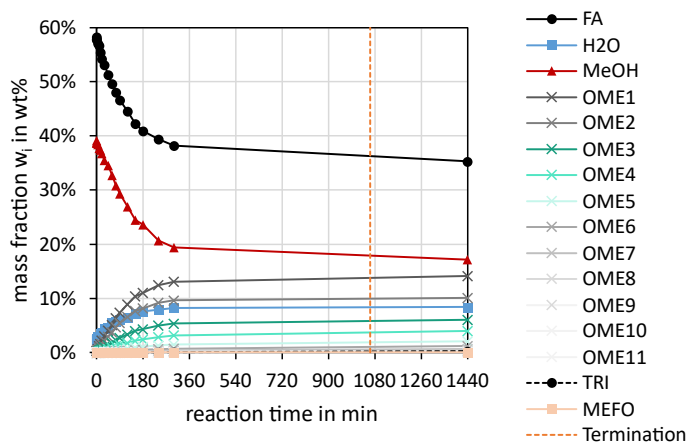

Figure S 7 - OME synthesis from MeOH-pFA over Nafion (conditions: pFA/MeOH = 1.49 g/g, Nafion/(MeOH+pFA) = 1.0 wt%, 60 °C, 8 bar, batch). The termination time represents the time after which 90 % of the OME<sub>5</sub> concentration after 24 h are obtained.

A15 – OME<sub>1</sub>-TRI feed mixtureTable S 8: OME synthesis from OME<sub>1</sub>-TRI over A15 (conditions: OME<sub>1</sub>/TRI = 1.99 g/g, A15/(OME<sub>1</sub>+TRI) = 1.0 wt%, 60 °C, 8 bar, batch). The concentrations are presented in mass fractions and the duration in minutes.

| t in min          | 0      | 0      | 1      | 5      | 10     | 15     | 20     | 30     | 45     | 60     | 75     | 90     | 120    | 150    | 180    | 240    | 300    | 1440   |
|-------------------|--------|--------|--------|--------|--------|--------|--------|--------|--------|--------|--------|--------|--------|--------|--------|--------|--------|--------|
| FA                | 0.0059 | 0.0000 | 0.0024 | 0.0136 | 0.0154 | 0.0218 | 0.0186 | 0.0200 | 0.0194 | 0.0182 | 0.0203 | 0.0203 | 0.0167 | 0.0168 | 0.0172 | 0.0168 | 0.0166 | 0.0164 |
| H <sub>2</sub> O  | 0.0000 | 0.0000 | 0.0000 | 0.0000 | 0.0000 | 0.0000 | 0.0000 | 0.0000 | 0.0000 | 0.0000 | 0.0000 | 0.0000 | 0.0000 | 0.0000 | 0.0000 | 0.0000 | 0.0000 | 0.0000 |
| MeOH              | 0.0026 | 0.0005 | 0.0062 | 0.0089 | 0.0102 | 0.0105 | 0.0103 | 0.0100 | 0.0094 | 0.0096 | 0.0086 | 0.0084 | 0.0083 | 0.0080 | 0.0078 | 0.0076 | 0.0072 | 0.0064 |
| OME <sub>1</sub>  | 0.5836 | 0.5878 | 0.5683 | 0.4521 | 0.3535 | 0.3179 | 0.3075 | 0.3009 | 0.2967 | 0.2684 | 0.2919 | 0.2905 | 0.2905 | 0.2897 | 0.2880 | 0.2891 | 0.2888 | 0.2847 |
| OME <sub>2</sub>  | 0.0020 | 0.0035 | 0.0197 | 0.1419 | 0.2092 | 0.2170 | 0.2187 | 0.2191 | 0.2172 | 0.2224 | 0.2157 | 0.2159 | 0.2164 | 0.2164 | 0.2164 | 0.2162 | 0.2160 | 0.2141 |
| OME <sub>3</sub>  | 0.0010 | 0.0006 | 0.0019 | 0.0518 | 0.1126 | 0.1322 | 0.1389 | 0.1418 | 0.1416 | 0.1473 | 0.1417 | 0.1421 | 0.1429 | 0.1432 | 0.1433 | 0.1432 | 0.1432 | 0.1424 |
| OME <sub>4</sub>  | 0.0010 | 0.0009 | 0.0008 | 0.0241 | 0.0697 | 0.0908 | 0.0994 | 0.1034 | 0.1040 | 0.1089 | 0.1047 | 0.1053 | 0.1062 | 0.1065 | 0.1066 | 0.1066 | 0.1067 | 0.1064 |
| OME <sub>5</sub>  | 0.0005 | 0.0001 | 0.0001 | 0.0095 | 0.0357 | 0.0513 | 0.0586 | 0.0623 | 0.0631 | 0.0666 | 0.0640 | 0.0645 | 0.0653 | 0.0656 | 0.0656 | 0.0657 | 0.0658 | 0.0658 |
| OME <sub>6</sub>  | 0.0003 | 0.0000 | 0.0000 | 0.0044 | 0.0202 | 0.0318 | 0.0379 | 0.0412 | 0.0421 | 0.0447 | 0.0430 | 0.0434 | 0.0441 | 0.0443 | 0.0444 | 0.0445 | 0.0445 | 0.0446 |
| OME <sub>7</sub>  | 0.0002 | 0.0000 | 0.0000 | 0.0021 | 0.0114 | 0.0193 | 0.0240 | 0.0267 | 0.0276 | 0.0294 | 0.0283 | 0.0286 | 0.0291 | 0.0293 | 0.0294 | 0.0295 | 0.0295 | 0.0295 |
| OME <sub>8</sub>  | 0.0001 | 0.0000 | 0.0000 | 0.0010 | 0.0065 | 0.0118 | 0.0152 | 0.0174 | 0.0181 | 0.0195 | 0.0187 | 0.0190 | 0.0194 | 0.0195 | 0.0196 | 0.0196 | 0.0197 | 0.0196 |
| OME <sub>9</sub>  | 0.0000 | 0.0000 | 0.0000 | 0.0000 | 0.0000 | 0.0073 | 0.0098 | 0.0115 | 0.0121 | 0.0131 | 0.0126 | 0.0128 | 0.0130 | 0.0132 | 0.0132 | 0.0133 | 0.0133 | 0.0133 |
| OME <sub>10</sub> | 0.0000 | 0.0000 | 0.0000 | 0.0000 | 0.0000 | 0.0000 | 0.0000 | 0.0000 | 0.0083 | 0.0090 | 0.0087 | 0.0088 | 0.0090 | 0.0091 | 0.0091 | 0.0092 | 0.0092 | 0.0092 |
| OME <sub>11</sub> | 0.0000 | 0.0000 | 0.0000 | 0.0000 | 0.0000 | 0.0000 | 0.0000 | 0.0000 | 0.0000 | 0.0065 | 0.0062 | 0.0063 | 0.0065 | 0.0066 | 0.0066 | 0.0066 | 0.0067 | 0.0067 |
| TRI               | 0.4028 | 0.4067 | 0.4005 | 0.2908 | 0.1557 | 0.0883 | 0.0611 | 0.0457 | 0.0403 | 0.0363 | 0.0354 | 0.0336 | 0.0320 | 0.0312 | 0.0318 | 0.0309 | 0.0310 | 0.0316 |
| MEFO              | 0.0000 | 0.0000 | 0.0000 | 0.0000 | 0.0000 | 0.0000 | 0.0000 | 0.0000 | 0.0001 | 0.0002 | 0.0003 | 0.0003 | 0.0006 | 0.0008 | 0.0009 | 0.0012 | 0.0017 | 0.0092 |

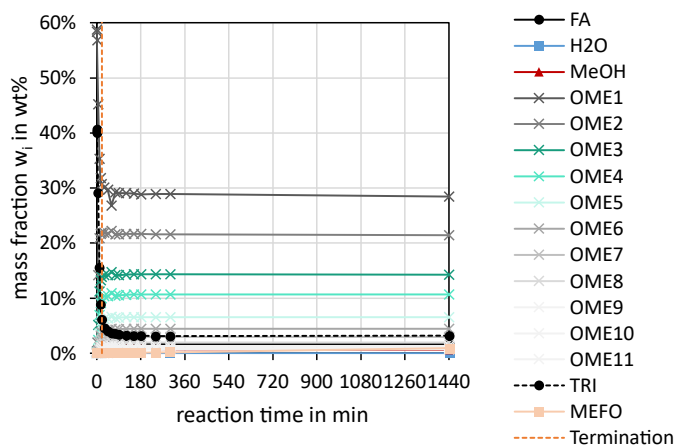Figure S8 - OME synthesis from OME<sub>1</sub>-TRI over A15 (conditions: OME<sub>1</sub>/TRI = 1.99 g/g, A15/(OME<sub>1</sub>+TRI) = 1.0 wt%, 60 °C, 8 bar, batch). The termination time represents the time after which 90 % of the OME<sub>5</sub> concentration after 24 h are obtained.



A36 – OME<sub>1</sub>-TRI feed mixture

Table S9: OME synthesis from OME<sub>1</sub>-TRI over A36 (conditions: OME<sub>1</sub>/TRI = 2.00 g/g, A36/(OME<sub>1</sub>+TRI) = 1.0 wt%, 60 °C, 8 bar, batch). The concentrations are presented in mass fractions and the duration in minutes.

| t in min          | 0      | 0      | 1      | 5      | 10     | 15     | 20     | 30     | 45     | 60     | 75     | 90     | 120    | 150    | 180    | 240    | 300    | 1440   |
|-------------------|--------|--------|--------|--------|--------|--------|--------|--------|--------|--------|--------|--------|--------|--------|--------|--------|--------|--------|
| FA                | 0.0000 | 0.0000 | 0.0000 | 0.0076 | 0.0116 | 0.0183 | 0.0221 | 0.0245 | 0.0265 | 0.0263 | 0.0256 | 0.0252 | 0.0241 | 0.0237 | 0.0238 | 0.0224 | 0.0222 | 0.0217 |
| H <sub>2</sub> O  | 0.0000 | 0.0000 | 0.0018 | 0.0013 | 0.0009 | 0.0007 | 0.0006 | 0.0000 | 0.0000 | 0.0000 | 0.0000 | 0.0000 | 0.0000 | 0.0000 | 0.0000 | 0.0000 | 0.0000 | 0.0000 |
| MeOH              | 0.0000 | 0.0058 | 0.0003 | 0.0095 | 0.0107 | 0.0112 | 0.0104 | 0.0106 | 0.0100 | 0.0094 | 0.0089 | 0.0098 | 0.0091 | 0.0087 | 0.0084 | 0.0079 | 0.0076 | 0.0058 |
| OME <sub>1</sub>  | 0.6621 | 0.6456 | 0.6540 | 0.6064 | 0.5362 | 0.4610 | 0.4144 | 0.3637 | 0.3380 | 0.3296 | 0.3255 | 0.3209 | 0.3191 | 0.3175 | 0.3169 | 0.3134 | 0.3141 | 0.3100 |
| OME <sub>2</sub>  | 0.0000 | 0.0061 | 0.0011 | 0.0503 | 0.1232 | 0.1815 | 0.2066 | 0.2226 | 0.2254 | 0.2251 | 0.2259 | 0.2230 | 0.2243 | 0.2254 | 0.2260 | 0.2274 | 0.2275 | 0.2256 |
| OME <sub>3</sub>  | 0.0000 | 0.0005 | 0.0004 | 0.0092 | 0.0363 | 0.0723 | 0.0976 | 0.1245 | 0.1360 | 0.1394 | 0.1414 | 0.1404 | 0.1422 | 0.1432 | 0.1438 | 0.1461 | 0.1462 | 0.1454 |
| OME <sub>4</sub>  | 0.0000 | 0.0002 | 0.0006 | 0.0025 | 0.0133 | 0.0336 | 0.0523 | 0.0775 | 0.0912 | 0.0960 | 0.0984 | 0.0986 | 0.1003 | 0.1013 | 0.1018 | 0.1041 | 0.1043 | 0.1041 |
| OME <sub>5</sub>  | 0.0000 | 0.0000 | 0.0003 | 0.0006 | 0.0041 | 0.0128 | 0.0226 | 0.0389 | 0.0495 | 0.0537 | 0.0557 | 0.0568 | 0.0579 | 0.0586 | 0.0588 | 0.0606 | 0.0608 | 0.0609 |
| OME <sub>6</sub>  | 0.0000 | 0.0000 | 0.0002 | 0.0002 | 0.0015 | 0.0053 | 0.0105 | 0.0209 | 0.0289 | 0.0323 | 0.0339 | 0.0356 | 0.0362 | 0.0367 | 0.0368 | 0.0381 | 0.0383 | 0.0387 |
| OME <sub>7</sub>  | 0.0000 | 0.0000 | 0.0001 | 0.0000 | 0.0006 | 0.0023 | 0.0049 | 0.0109 | 0.0162 | 0.0187 | 0.0199 | 0.0215 | 0.0219 | 0.0222 | 0.0222 | 0.0231 | 0.0233 | 0.0239 |
| OME <sub>8</sub>  | 0.0000 | 0.0000 | 0.0000 | 0.0000 | 0.0003 | 0.0010 | 0.0023 | 0.0057 | 0.0091 | 0.0108 | 0.0116 | 0.0129 | 0.0131 | 0.0133 | 0.0133 | 0.0139 | 0.0141 | 0.0145 |
| OME <sub>9</sub>  | 0.0000 | 0.0000 | 0.0000 | 0.0000 | 0.0000 | 0.0005 | 0.0012 | 0.0031 | 0.0053 | 0.0065 | 0.0071 | 0.0080 | 0.0082 | 0.0084 | 0.0084 | 0.0088 | 0.0089 | 0.0092 |
| OME <sub>10</sub> | 0.0000 | 0.0000 | 0.0000 | 0.0000 | 0.0000 | 0.0000 | 0.0006 | 0.0017 | 0.0031 | 0.0039 | 0.0043 | 0.0049 | 0.0050 | 0.0051 | 0.0052 | 0.0054 | 0.0055 | 0.0057 |
| OME <sub>11</sub> | 0.0000 | 0.0000 | 0.0000 | 0.0000 | 0.0000 | 0.0000 | 0.0000 | 0.0011 | 0.0020 | 0.0026 | 0.0029 | 0.0031 | 0.0034 | 0.0034 | 0.0035 | 0.0037 | 0.0037 | 0.0038 |
| TRI               | 0.3379 | 0.3416 | 0.3412 | 0.3124 | 0.2614 | 0.1994 | 0.1538 | 0.0943 | 0.0588 | 0.0455 | 0.0387 | 0.0389 | 0.0348 | 0.0318 | 0.0307 | 0.0242 | 0.0224 | 0.0235 |
| MEFO              | 0.0000 | 0.0000 | 0.0000 | 0.0000 | 0.0000 | 0.0000 | 0.0000 | 0.0000 | 0.0000 | 0.0002 | 0.0002 | 0.0003 | 0.0004 | 0.0005 | 0.0006 | 0.0008 | 0.0011 | 0.0073 |

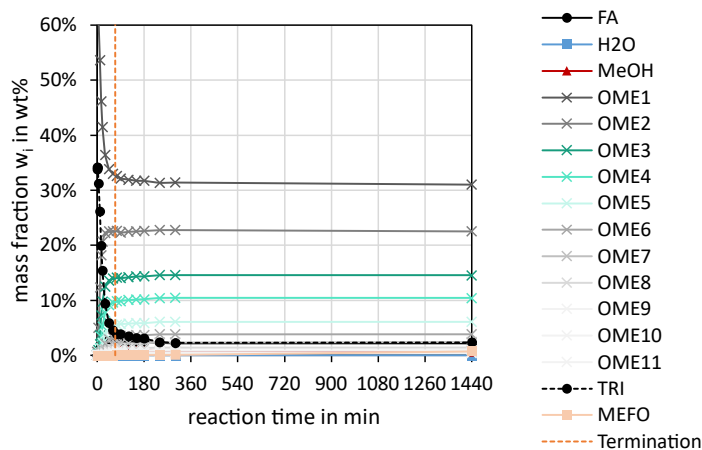

Figure S9 - OME synthesis from OME<sub>1</sub>-TRI over A36 (conditions: OME<sub>1</sub>/TRI = 2.00 g/g, A36/(OME<sub>1</sub>+TRI) = 1.0 wt%, 60 °C, 8 bar, batch). The termination time represents the time after which 90 % of the OME<sub>5</sub> concentration after 24 h are obtained.

A46 – OME<sub>1</sub>-TRI feed mixture

Table S10: OME synthesis from OME<sub>1</sub>-TRI over A46 (conditions: OME<sub>1</sub>/TRI = 2.00 g/g, A46/(OME<sub>1</sub>+TRI) = 1.0 wt%, 60 °C, 8 bar, batch). The concentrations are presented in mass fractions and the duration in minutes.

| t in min          | 0      | 0      | 1      | 5      | 10     | 15     | 20     | 30     | 45     | 60     | 75     | 90     | 120    | 150    | 180    | 240    | 300    | 1440   |
|-------------------|--------|--------|--------|--------|--------|--------|--------|--------|--------|--------|--------|--------|--------|--------|--------|--------|--------|--------|
| FA                | 0.0024 | 0.0025 | 0.0028 | 0.0046 | 0.0056 | 0.0065 | 0.0066 | 0.0083 | 0.0049 | 0.0050 | 0.0045 | 0.0050 | 0.0035 | 0.0059 | 0.0045 | 0.0045 | 0.0045 | 0.0044 |
| H <sub>2</sub> O  | 0.0000 | 0.0000 | 0.0000 | 0.0000 | 0.0000 | 0.0000 | 0.0000 | 0.0000 | 0.0000 | 0.0000 | 0.0000 | 0.0000 | 0.0000 | 0.0000 | 0.0000 | 0.0000 | 0.0000 | 0.0000 |
| MeOH              | 0.0000 | 0.0003 | 0.0041 | 0.0048 | 0.0050 | 0.0049 | 0.0046 | 0.0044 | 0.0041 | 0.0040 | 0.0040 | 0.0038 | 0.0037 | 0.0036 | 0.0036 | 0.0035 | 0.0035 | 0.0034 |
| OME <sub>1</sub>  | 0.6961 | 0.6974 | 0.6792 | 0.4957 | 0.3945 | 0.3571 | 0.3528 | 0.3421 | 0.3364 | 0.3305 | 0.3273 | 0.3261 | 0.3263 | 0.3253 | 0.3226 | 0.3233 | 0.3222 | 0.3223 |
| OME <sub>2</sub>  | 0.0001 | 0.0004 | 0.0134 | 0.1811 | 0.2297 | 0.2340 | 0.2308 | 0.2321 | 0.2326 | 0.2320 | 0.2316 | 0.2320 | 0.2318 | 0.2312 | 0.2326 | 0.2321 | 0.2321 | 0.2330 |
| OME <sub>3</sub>  | 0.0000 | 0.0001 | 0.0009 | 0.0722 | 0.1231 | 0.1395 | 0.1408 | 0.1445 | 0.1464 | 0.1476 | 0.1480 | 0.1482 | 0.1486 | 0.1483 | 0.1496 | 0.1493 | 0.1496 | 0.1503 |
| OME <sub>4</sub>  | 0.0000 | 0.0002 | 0.0003 | 0.0352 | 0.0747 | 0.0928 | 0.0959 | 0.1003 | 0.1026 | 0.1043 | 0.1051 | 0.1053 | 0.1058 | 0.1057 | 0.1068 | 0.1067 | 0.1071 | 0.1076 |
| OME <sub>5</sub>  | 0.0001 | 0.0000 | 0.0000 | 0.0134 | 0.0361 | 0.0495 | 0.0529 | 0.0565 | 0.0584 | 0.0600 | 0.0608 | 0.0609 | 0.0614 | 0.0613 | 0.0622 | 0.0621 | 0.0624 | 0.0627 |
| OME <sub>6</sub>  | 0.0000 | 0.0000 | 0.0000 | 0.0057 | 0.0187 | 0.0284 | 0.0313 | 0.0342 | 0.0358 | 0.0371 | 0.0379 | 0.0379 | 0.0383 | 0.0383 | 0.0389 | 0.0390 | 0.0391 | 0.0392 |
| OME <sub>7</sub>  | 0.0000 | 0.0000 | 0.0000 | 0.0024 | 0.0093 | 0.0155 | 0.0177 | 0.0199 | 0.0210 | 0.0220 | 0.0226 | 0.0226 | 0.0229 | 0.0229 | 0.0234 | 0.0234 | 0.0236 | 0.0235 |
| OME <sub>8</sub>  | 0.0000 | 0.0000 | 0.0000 | 0.0011 | 0.0047 | 0.0085 | 0.0100 | 0.0115 | 0.0123 | 0.0129 | 0.0134 | 0.0134 | 0.0136 | 0.0136 | 0.0140 | 0.0140 | 0.0141 | 0.0139 |
| OME <sub>9</sub>  | 0.0000 | 0.0000 | 0.0000 | 0.0000 | 0.0000 | 0.0048 | 0.0058 | 0.0069 | 0.0074 | 0.0079 | 0.0083 | 0.0083 | 0.0084 | 0.0084 | 0.0087 | 0.0087 | 0.0088 | 0.0086 |
| OME <sub>10</sub> | 0.0000 | 0.0000 | 0.0000 | 0.0000 | 0.0000 | 0.0000 | 0.0000 | 0.0000 | 0.0046 | 0.0049 | 0.0051 | 0.0051 | 0.0052 | 0.0053 | 0.0054 | 0.0054 | 0.0055 | 0.0054 |
| OME <sub>11</sub> | 0.0000 | 0.0000 | 0.0000 | 0.0000 | 0.0000 | 0.0000 | 0.0000 | 0.0000 | 0.0000 | 0.0033 | 0.0035 | 0.0035 | 0.0036 | 0.0036 | 0.0037 | 0.0037 | 0.0037 | 0.0037 |
| TRI               | 0.3012 | 0.2992 | 0.2992 | 0.1839 | 0.0986 | 0.0585 | 0.0507 | 0.0395 | 0.0336 | 0.0285 | 0.0280 | 0.0279 | 0.0267 | 0.0264 | 0.0238 | 0.0239 | 0.0234 | 0.0209 |
| MEFO              | 0.0000 | 0.0000 | 0.0000 | 0.0000 | 0.0000 | 0.0000 | 0.0000 | 0.0000 | 0.0000 | 0.0000 | 0.0000 | 0.0000 | 0.0002 | 0.0002 | 0.0002 | 0.0003 | 0.0004 | 0.0012 |

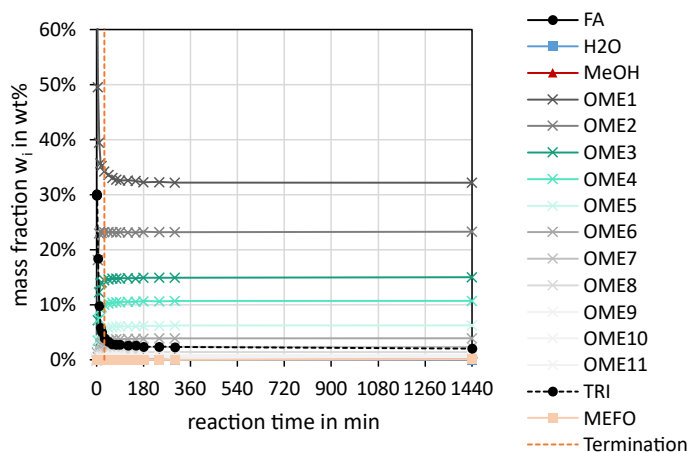

Figure S10 - OME synthesis from OME<sub>1</sub>-TRI over A46 (conditions: OME<sub>1</sub>/TRI = 2.00 g/g, A46/(OME<sub>1</sub>+TRI) = 1.0 wt%, 60 °C, 8 bar, batch). The termination time represents the time after which 90 % of the OME<sub>5</sub> concentration after 24 h are obtained.

Dowex – OME<sub>1</sub>-TRI feed mixtureTable S11: OME synthesis from OME<sub>1</sub>-TRI over Dowex (conditions: OME<sub>1</sub>/TRI = 2.01 g/g, Dowex/(OME<sub>1</sub>+TRI) = 1.0 wt%, 60 °C, 8 bar, batch). The concentrations are presented in mass fractions and the duration in minutes.

| t in min          | 0      | 0      | 1      | 5      | 10     | 15     | 20     | 30     | 45     | 60     | 90     | 120    | 180    | 240    | 300    | 1440   |
|-------------------|--------|--------|--------|--------|--------|--------|--------|--------|--------|--------|--------|--------|--------|--------|--------|--------|
| FA                | 0.0024 | 0.0024 | 0.0030 | 0.0055 | 0.0160 | 0.0233 | 0.0265 | 0.0229 | 0.0254 | 0.0154 | 0.0102 | 0.0158 | 0.0190 | 0.0190 | 0.0190 | 0.0181 |
| H <sub>2</sub> O  | 0.0000 | 0.0000 | 0.0000 | 0.0000 | 0.0000 | 0.0000 | 0.0000 | 0.0000 | 0.0000 | 0.0000 | 0.0000 | 0.0000 | 0.0000 | 0.0000 | 0.0000 | 0.0000 |
| MeOH              | 0.0000 | 0.0009 | 0.0062 | 0.0067 | 0.0067 | 0.0066 | 0.0062 | 0.0057 | 0.0053 | 0.0051 | 0.0049 | 0.0048 | 0.0043 | 0.0042 | 0.0042 | 0.0042 |
| OME <sub>1</sub>  | 0.6245 | 0.6470 | 0.6212 | 0.5667 | 0.4229 | 0.3499 | 0.3358 | 0.3225 | 0.3067 | 0.3071 | 0.3034 | 0.2910 | 0.2984 | 0.2948 | 0.2959 | 0.2836 |
| OME <sub>2</sub>  | 0.0000 | 0.0017 | 0.0087 | 0.0805 | 0.2066 | 0.2300 | 0.2287 | 0.2295 | 0.2287 | 0.2294 | 0.2309 | 0.2289 | 0.2284 | 0.2284 | 0.2283 | 0.2276 |
| OME <sub>3</sub>  | 0.0000 | 0.0003 | 0.0007 | 0.0160 | 0.0884 | 0.1300 | 0.1366 | 0.1439 | 0.1485 | 0.1503 | 0.1529 | 0.1548 | 0.1524 | 0.1534 | 0.1531 | 0.1558 |
| OME <sub>4</sub>  | 0.0000 | 0.0001 | 0.0002 | 0.0043 | 0.0410 | 0.0793 | 0.0884 | 0.0975 | 0.1043 | 0.1068 | 0.1098 | 0.1123 | 0.1102 | 0.1113 | 0.1110 | 0.1138 |
| OME <sub>5</sub>  | 0.0000 | 0.0001 | 0.0000 | 0.0011 | 0.0150 | 0.0386 | 0.0461 | 0.0536 | 0.0593 | 0.0617 | 0.0640 | 0.0658 | 0.0647 | 0.0654 | 0.0652 | 0.0672 |
| OME <sub>6</sub>  | 0.0000 | 0.0000 | 0.0000 | 0.0005 | 0.0060 | 0.0201 | 0.0257 | 0.0315 | 0.0363 | 0.0383 | 0.0402 | 0.0415 | 0.0409 | 0.0414 | 0.0413 | 0.0428 |
| OME <sub>7</sub>  | 0.0000 | 0.0000 | 0.0000 | 0.0002 | 0.0024 | 0.0100 | 0.0137 | 0.0178 | 0.0213 | 0.0229 | 0.0243 | 0.0253 | 0.0249 | 0.0253 | 0.0253 | 0.0263 |
| OME <sub>8</sub>  | 0.0000 | 0.0000 | 0.0000 | 0.0000 | 0.0010 | 0.0049 | 0.0072 | 0.0100 | 0.0124 | 0.0136 | 0.0146 | 0.0152 | 0.0151 | 0.0153 | 0.0153 | 0.0159 |
| OME <sub>9</sub>  | 0.0000 | 0.0000 | 0.0000 | 0.0000 | 0.0000 | 0.0025 | 0.0039 | 0.0057 | 0.0073 | 0.0081 | 0.0089 | 0.0093 | 0.0092 | 0.0094 | 0.0094 | 0.0098 |
| OME <sub>10</sub> | 0.0000 | 0.0000 | 0.0000 | 0.0000 | 0.0000 | 0.0000 | 0.0000 | 0.0000 | 0.0043 | 0.0048 | 0.0053 | 0.0056 | 0.0056 | 0.0057 | 0.0057 | 0.0059 |
| OME <sub>11</sub> | 0.0000 | 0.0000 | 0.0000 | 0.0000 | 0.0000 | 0.0000 | 0.0000 | 0.0000 | 0.0000 | 0.0030 | 0.0034 | 0.0036 | 0.0036 | 0.0037 | 0.0036 | 0.0037 |
| TRI               | 0.3731 | 0.3474 | 0.3595 | 0.3178 | 0.1941 | 0.1047 | 0.0812 | 0.0593 | 0.0402 | 0.0335 | 0.0274 | 0.0261 | 0.0229 | 0.0223 | 0.0224 | 0.0233 |
| MEFO              | 0.0000 | 0.0000 | 0.0004 | 0.0006 | 0.0000 | 0.0000 | 0.0000 | 0.0000 | 0.0000 | 0.0000 | 0.0000 | 0.0000 | 0.0002 | 0.0003 | 0.0004 | 0.0019 |

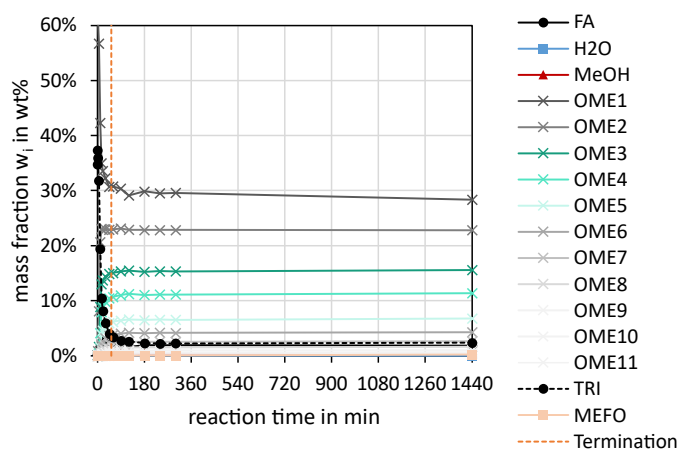Figure S11 - OME synthesis from OME<sub>1</sub>-TRI over Dowex (conditions: OME<sub>1</sub>/TRI = 2.01 g/g, Dowex/(OME<sub>1</sub>+TRI) = 1.0 wt%, 60 °C, 8 bar, batch). The termination time represents the time after which 90 % of the OME<sub>5</sub> concentration after 24 h are obtained.

H-BEA 25 – OME<sub>1</sub>-TRI feed mixture

Table S12: OME synthesis from OME<sub>1</sub>-TRI over H-BEA 25 (conditions: OME<sub>1</sub>/TRI = 2.01 g/g, H-BEA 25/(OME<sub>1</sub>+TRI) = 1.0 wt%, 60 °C, 8 bar, batch). The concentrations are presented in mass fractions and the duration in minutes.

| t in min          | 0      | 0      | 1      | 5      | 10     | 15     | 20     | 30     | 45     | 60     | 75     | 90     | 120    | 150    | 180    | 240    | 300    | 1440   |
|-------------------|--------|--------|--------|--------|--------|--------|--------|--------|--------|--------|--------|--------|--------|--------|--------|--------|--------|--------|
| FA                | 0.0018 | 0.0028 | 0.0023 | 0.0023 | 0.0036 | 0.0044 | 0.0057 | 0.0054 | 0.0064 | 0.0076 | 0.0077 | 0.0077 | 0.0084 | 0.0126 | 0.0111 | 0.0119 | 0.0104 | 0.0080 |
| H <sub>2</sub> O  | 0.0000 | 0.0000 | 0.0000 | 0.0000 | 0.0000 | 0.0000 | 0.0000 | 0.0000 | 0.0000 | 0.0000 | 0.0000 | 0.0000 | 0.0000 | 0.0000 | 0.0000 | 0.0000 | 0.0000 | 0.0000 |
| MeOH              | 0.0000 | 0.0010 | 0.0015 | 0.0024 | 0.0024 | 0.0022 | 0.0021 | 0.0018 | 0.0017 | 0.0017 | 0.0015 | 0.0014 | 0.0013 | 0.0012 | 0.0012 | 0.0012 | 0.0012 | 0.0011 |
| OME <sub>1</sub>  | 0.6647 | 0.6468 | 0.6512 | 0.6403 | 0.5948 | 0.5290 | 0.4749 | 0.4089 | 0.3550 | 0.3294 | 0.3188 | 0.3090 | 0.3098 | 0.3141 | 0.3164 | 0.3179 | 0.3210 | 0.3319 |
| OME <sub>2</sub>  | 0.0000 | 0.0168 | 0.0100 | 0.0221 | 0.0671 | 0.1245 | 0.1666 | 0.2065 | 0.2282 | 0.2310 | 0.2317 | 0.2271 | 0.2277 | 0.2304 | 0.2307 | 0.2322 | 0.2328 | 0.2345 |
| OME <sub>3</sub>  | 0.0000 | 0.0031 | 0.0020 | 0.0043 | 0.0184 | 0.0430 | 0.0683 | 0.1009 | 0.1301 | 0.1426 | 0.1486 | 0.1476 | 0.1482 | 0.1496 | 0.1493 | 0.1494 | 0.1488 | 0.1451 |
| OME <sub>4</sub>  | 0.0000 | 0.0026 | 0.0013 | 0.0031 | 0.0125 | 0.0279 | 0.0446 | 0.0674 | 0.0891 | 0.1003 | 0.1068 | 0.1072 | 0.1075 | 0.1081 | 0.1075 | 0.1069 | 0.1057 | 0.0995 |
| OME <sub>5</sub>  | 0.0000 | 0.0005 | 0.0003 | 0.0007 | 0.0035 | 0.0097 | 0.0179 | 0.0311 | 0.0462 | 0.0558 | 0.0618 | 0.0635 | 0.0639 | 0.0640 | 0.0634 | 0.0625 | 0.0613 | 0.0556 |
| OME <sub>6</sub>  | 0.0000 | 0.0003 | 0.0002 | 0.0003 | 0.0014 | 0.0042 | 0.0083 | 0.0158 | 0.0259 | 0.0334 | 0.0385 | 0.0409 | 0.0413 | 0.0411 | 0.0406 | 0.0395 | 0.0385 | 0.0335 |
| OME <sub>7</sub>  | 0.0000 | 0.0001 | 0.0000 | 0.0001 | 0.0007 | 0.0020 | 0.0041 | 0.0081 | 0.0142 | 0.0192 | 0.0230 | 0.0253 | 0.0256 | 0.0254 | 0.0249 | 0.0241 | 0.0231 | 0.0194 |
| OME <sub>8</sub>  | 0.0000 | 0.0000 | 0.0000 | 0.0000 | 0.0003 | 0.0009 | 0.0020 | 0.0041 | 0.0077 | 0.0109 | 0.0135 | 0.0154 | 0.0157 | 0.0155 | 0.0152 | 0.0145 | 0.0138 | 0.0111 |
| OME <sub>9</sub>  | 0.0000 | 0.0000 | 0.0000 | 0.0000 | 0.0000 | 0.0005 | 0.0010 | 0.0022 | 0.0042 | 0.0063 | 0.0081 | 0.0094 | 0.0096 | 0.0096 | 0.0093 | 0.0088 | 0.0083 | 0.0064 |
| OME <sub>10</sub> | 0.0000 | 0.0000 | 0.0000 | 0.0000 | 0.0000 | 0.0000 | 0.0000 | 0.0000 | 0.0024 | 0.0036 | 0.0048 | 0.0057 | 0.0059 | 0.0059 | 0.0057 | 0.0054 | 0.0051 | 0.0038 |
| OME <sub>11</sub> | 0.0000 | 0.0000 | 0.0000 | 0.0000 | 0.0000 | 0.0000 | 0.0000 | 0.0000 | 0.0000 | 0.0023 | 0.0030 | 0.0037 | 0.0039 | 0.0039 | 0.0038 | 0.0036 | 0.0034 | 0.0024 |
| TRI               | 0.3335 | 0.3260 | 0.3312 | 0.3243 | 0.2950 | 0.2512 | 0.2037 | 0.1463 | 0.0867 | 0.0529 | 0.0359 | 0.0314 | 0.0252 | 0.0238 | 0.0232 | 0.0230 | 0.0231 | 0.0207 |
| MEFO              | 0.0000 | 0.0000 | 0.0000 | 0.0000 | 0.0003 | 0.0006 | 0.0010 | 0.0014 | 0.0022 | 0.0031 | 0.0040 | 0.0046 | 0.0060 | 0.0074 | 0.0086 | 0.0110 | 0.0140 | 0.0351 |

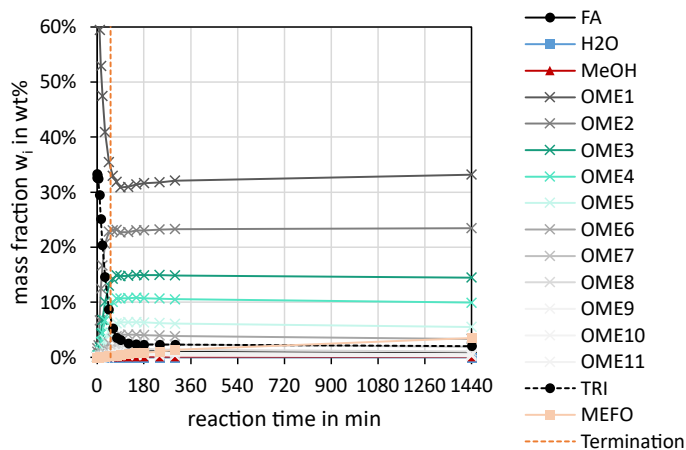

Figure S12 - OME synthesis from OME<sub>1</sub>-TRI over H-BEA 25 (conditions: OME<sub>1</sub>/TRI = 2.01 g/g, H-BEA 25/(OME<sub>1</sub>+TRI) = 1.0 wt%, 60 °C, 8 bar, batch). The termination time represents the time after which 90 % of the OME<sub>5</sub> concentration after 24 h are obtained.

**H-MFI 90 – OME<sub>1</sub>-TRI feed mixture**

Table S13: OME synthesis from OME<sub>1</sub>-TRI over H-MFI 90 (conditions: OME<sub>1</sub>/TRI = 2.00 g/g, H-MFI 90/(OME<sub>1</sub>+TRI) = 1.0 wt%, 60 °C, 8 bar, batch). The concentrations are presented in mass fractions and the duration in minutes.

| t in min          | 0      | 0      | 1      | 5      | 10     | 15     | 20     | 30     | 45     | 60     | 75     | 90     | 120    | 150    | 180    | 240    | 300    | 1440   |
|-------------------|--------|--------|--------|--------|--------|--------|--------|--------|--------|--------|--------|--------|--------|--------|--------|--------|--------|--------|
| FA                | 0.0012 | 0.0018 | 0.0020 | 0.0031 | 0.0035 | 0.0044 | 0.0073 | 0.0054 | 0.0060 | 0.0064 | 0.0070 | 0.0070 | 0.0073 | 0.0070 | 0.0067 | 0.0070 | 0.0088 | 0.0066 |
| H <sub>2</sub> O  | 0.0000 | 0.0000 | 0.0000 | 0.0000 | 0.0000 | 0.0000 | 0.0000 | 0.0000 | 0.0000 | 0.0000 | 0.0000 | 0.0000 | 0.0000 | 0.0000 | 0.0000 | 0.0000 | 0.0000 | 0.0000 |
| MeOH              | 0.0000 | 0.0004 | 0.0009 | 0.0016 | 0.0016 | 0.0014 | 0.0013 | 0.0012 | 0.0010 | 0.0009 | 0.0009 | 0.0009 | 0.0008 | 0.0008 | 0.0007 | 0.0007 | 0.0006 | 0.0005 |
| OME <sub>1</sub>  | 0.6532 | 0.6551 | 0.6528 | 0.6404 | 0.6014 | 0.5553 | 0.5128 | 0.4494 | 0.3958 | 0.3711 | 0.3550 | 0.3437 | 0.3299 | 0.3248 | 0.3190 | 0.3191 | 0.3116 | 0.3419 |
| OME <sub>2</sub>  | 0.0000 | 0.0036 | 0.0043 | 0.0162 | 0.0585 | 0.1056 | 0.1448 | 0.1937 | 0.2190 | 0.2259 | 0.2308 | 0.2297 | 0.2297 | 0.2317 | 0.2302 | 0.2305 | 0.2287 | 0.2343 |
| OME <sub>3</sub>  | 0.0000 | 0.0009 | 0.0007 | 0.0027 | 0.0127 | 0.0269 | 0.0440 | 0.0775 | 0.1076 | 0.1219 | 0.1320 | 0.1355 | 0.1414 | 0.1457 | 0.1463 | 0.1471 | 0.1472 | 0.1405 |
| OME <sub>4</sub>  | 0.0000 | 0.0008 | 0.0006 | 0.0020 | 0.0074 | 0.0138 | 0.0215 | 0.0398 | 0.0620 | 0.0751 | 0.0853 | 0.0900 | 0.0975 | 0.1023 | 0.1037 | 0.1044 | 0.1050 | 0.0930 |
| OME <sub>5</sub>  | 0.0000 | 0.0002 | 0.0001 | 0.0002 | 0.0013 | 0.0033 | 0.0064 | 0.0153 | 0.0283 | 0.0371 | 0.0443 | 0.0483 | 0.0547 | 0.0585 | 0.0599 | 0.0606 | 0.0615 | 0.0501 |
| OME <sub>6</sub>  | 0.0000 | 0.0002 | 0.0000 | 0.0001 | 0.0004 | 0.0010 | 0.0022 | 0.0063 | 0.0138 | 0.0197 | 0.0249 | 0.0280 | 0.0331 | 0.0363 | 0.0375 | 0.0381 | 0.0394 | 0.0292 |
| OME <sub>7</sub>  | 0.0000 | 0.0000 | 0.0000 | 0.0000 | 0.0002 | 0.0004 | 0.0008 | 0.0025 | 0.0064 | 0.0101 | 0.0134 | 0.0156 | 0.0193 | 0.0215 | 0.0225 | 0.0230 | 0.0243 | 0.0162 |
| OME <sub>8</sub>  | 0.0000 | 0.0000 | 0.0000 | 0.0000 | 0.0000 | 0.0000 | 0.0002 | 0.0010 | 0.0030 | 0.0051 | 0.0072 | 0.0086 | 0.0111 | 0.0127 | 0.0134 | 0.0137 | 0.0148 | 0.0089 |
| OME <sub>9</sub>  | 0.0000 | 0.0000 | 0.0000 | 0.0000 | 0.0000 | 0.0000 | 0.0000 | 0.0004 | 0.0014 | 0.0026 | 0.0039 | 0.0048 | 0.0065 | 0.0076 | 0.0081 | 0.0083 | 0.0091 | 0.0050 |
| OME <sub>10</sub> | 0.0000 | 0.0000 | 0.0000 | 0.0000 | 0.0000 | 0.0000 | 0.0000 | 0.0000 | 0.0007 | 0.0014 | 0.0021 | 0.0027 | 0.0038 | 0.0045 | 0.0049 | 0.0050 | 0.0055 | 0.0028 |
| OME <sub>11</sub> | 0.0000 | 0.0000 | 0.0000 | 0.0000 | 0.0000 | 0.0000 | 0.0000 | 0.0000 | 0.0000 | 0.0004 | 0.0012 | 0.0016 | 0.0024 | 0.0029 | 0.0031 | 0.0032 | 0.0036 | 0.0017 |
| TRI               | 0.3456 | 0.3371 | 0.3385 | 0.3333 | 0.3123 | 0.2867 | 0.2571 | 0.2051 | 0.1513 | 0.1175 | 0.0934 | 0.0769 | 0.0546 | 0.0412 | 0.0333 | 0.0261 | 0.0248 | 0.0193 |
| MEFO              | 0.0000 | 0.0000 | 0.0000 | 0.0004 | 0.0008 | 0.0012 | 0.0017 | 0.0026 | 0.0037 | 0.0047 | 0.0057 | 0.0065 | 0.0079 | 0.0094 | 0.0106 | 0.0132 | 0.0151 | 0.0501 |

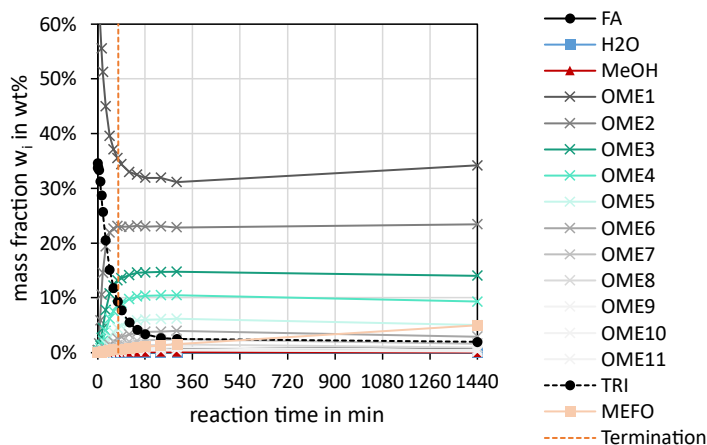

Figure S13 - OME synthesis from OME<sub>1</sub>-TRI over H-MFI 90 (conditions: OME<sub>1</sub>/TRI = 2.00 g/g, H-MFI 90/(OME<sub>1</sub>+TRI) = 1.0 wt%, 60 °C, 8 bar, batch). The termination time represents the time after which 90 % of the OME<sub>5</sub> concentration after 24 h are obtained.

Nafion – OME<sub>1</sub>-TRI feed mixture

Table S14: OME synthesis from OME<sub>1</sub>-TRI over Nafion (conditions: OME<sub>1</sub>/TRI = 1.99 g/g, Nafion/(OME<sub>1</sub>+TRI) = 1.0 wt%, 60 °C, 8 bar, batch). The concentrations are presented in mass fractions and the duration in minutes.

| t in min          | 0      | 0      | 1      | 5      | 10     | 15     | 20     | 30     | 45     | 60     | 75     | 90     | 120    | 150    | 180    | 240    | 300    | 1440   |
|-------------------|--------|--------|--------|--------|--------|--------|--------|--------|--------|--------|--------|--------|--------|--------|--------|--------|--------|--------|
| FA                | 0.0000 | 0.0000 | 0.0000 | 0.0000 | 0.0023 | 0.0035 | 0.0053 | 0.0073 | 0.0071 | 0.0078 | 0.0100 | 0.0081 | 0.0091 | 0.0097 | 0.0086 | 0.0100 | 0.0084 | 0.0098 |
| H <sub>2</sub> O  | 0.0002 | 0.0002 | 0.0000 | 0.0000 | 0.0000 | 0.0000 | 0.0000 | 0.0000 | 0.0000 | 0.0000 | 0.0000 | 0.0000 | 0.0000 | 0.0000 | 0.0000 | 0.0000 | 0.0000 | 0.0005 |
| MeOH              | 0.0000 | 0.0004 | 0.0005 | 0.0010 | 0.0012 | 0.0013 | 0.0015 | 0.0016 | 0.0019 | 0.0019 | 0.0020 | 0.0021 | 0.0022 | 0.0022 | 0.0028 | 0.0028 | 0.0028 | 0.0024 |
| OME <sub>1</sub>  | 0.6564 | 0.6627 | 0.6644 | 0.6396 | 0.5917 | 0.5464 | 0.5037 | 0.4424 | 0.3865 | 0.3549 | 0.3372 | 0.3271 | 0.3163 | 0.3091 | 0.3140 | 0.3115 | 0.3098 | 0.2940 |
| OME <sub>2</sub>  | 0.0000 | 0.0005 | 0.0038 | 0.0369 | 0.0873 | 0.1295 | 0.1635 | 0.2050 | 0.2290 | 0.2341 | 0.2337 | 0.2332 | 0.2308 | 0.2288 | 0.2300 | 0.2291 | 0.2286 | 0.2304 |
| OME <sub>3</sub>  | 0.0000 | 0.0002 | 0.0003 | 0.0065 | 0.0211 | 0.0381 | 0.0561 | 0.0874 | 0.1179 | 0.1342 | 0.1415 | 0.1458 | 0.1484 | 0.1493 | 0.1492 | 0.1492 | 0.1493 | 0.1509 |
| OME <sub>4</sub>  | 0.0000 | 0.0002 | 0.0002 | 0.0020 | 0.0072 | 0.0145 | 0.0236 | 0.0430 | 0.0675 | 0.0848 | 0.0946 | 0.1006 | 0.1058 | 0.1082 | 0.1076 | 0.1079 | 0.1084 | 0.1094 |
| OME <sub>5</sub>  | 0.0001 | 0.0000 | 0.0000 | 0.0004 | 0.0016 | 0.0039 | 0.0072 | 0.0160 | 0.0301 | 0.0422 | 0.0502 | 0.0557 | 0.0612 | 0.0639 | 0.0633 | 0.0637 | 0.0643 | 0.0648 |
| OME <sub>6</sub>  | 0.0000 | 0.0000 | 0.0000 | 0.0001 | 0.0005 | 0.0012 | 0.0024 | 0.0063 | 0.0141 | 0.0221 | 0.0281 | 0.0326 | 0.0378 | 0.0406 | 0.0401 | 0.0407 | 0.0413 | 0.0416 |
| OME <sub>7</sub>  | 0.0000 | 0.0000 | 0.0000 | 0.0000 | 0.0002 | 0.0004 | 0.0009 | 0.0025 | 0.0063 | 0.0110 | 0.0150 | 0.0182 | 0.0224 | 0.0248 | 0.0245 | 0.0251 | 0.0256 | 0.0258 |
| OME <sub>8</sub>  | 0.0000 | 0.0000 | 0.0000 | 0.0000 | 0.0000 | 0.0002 | 0.0003 | 0.0010 | 0.0029 | 0.0054 | 0.0078 | 0.0100 | 0.0130 | 0.0150 | 0.0148 | 0.0153 | 0.0158 | 0.0159 |
| OME <sub>9</sub>  | 0.0000 | 0.0000 | 0.0000 | 0.0000 | 0.0000 | 0.0000 | 0.0000 | 0.0005 | 0.0014 | 0.0028 | 0.0042 | 0.0057 | 0.0078 | 0.0093 | 0.0093 | 0.0098 | 0.0102 | 0.0101 |
| OME <sub>10</sub> | 0.0000 | 0.0000 | 0.0000 | 0.0000 | 0.0000 | 0.0000 | 0.0000 | 0.0000 | 0.0007 | 0.0014 | 0.0023 | 0.0032 | 0.0046 | 0.0056 | 0.0057 | 0.0061 | 0.0064 | 0.0063 |
| OME <sub>11</sub> | 0.0000 | 0.0000 | 0.0000 | 0.0000 | 0.0000 | 0.0000 | 0.0000 | 0.0000 | 0.0000 | 0.0008 | 0.0013 | 0.0019 | 0.0029 | 0.0037 | 0.0038 | 0.0041 | 0.0043 | 0.0042 |
| TRI               | 0.3433 | 0.3358 | 0.3308 | 0.3136 | 0.2870 | 0.2611 | 0.2355 | 0.1868 | 0.1346 | 0.0966 | 0.0719 | 0.0558 | 0.0375 | 0.0296 | 0.0260 | 0.0242 | 0.0240 | 0.0251 |
| MEFO              | 0.0000 | 0.0000 | 0.0000 | 0.0000 | 0.0000 | 0.0000 | 0.0000 | 0.0000 | 0.0000 | 0.0000 | 0.0000 | 0.0000 | 0.0002 | 0.0002 | 0.0003 | 0.0006 | 0.0009 | 0.0088 |

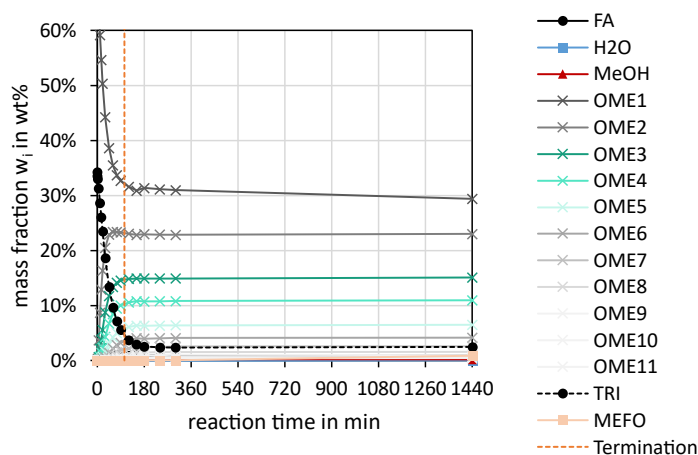

Figure S14 - OME synthesis from OME<sub>1</sub>-TRI over Nafion (conditions: OME<sub>1</sub>/TRI = 1.99 g/g, Nafion/(OME<sub>1</sub>+TRI) = 1.0 wt%, 60 °C, 8 bar, batch). The termination time represents the time after which 90 % of the OME<sub>5</sub> concentration after 24 h are obtained.

Table S15 and Table S16 list the bottom product composition of the distillations of the OME synthesis products from the MeOH-pFA and OME<sub>1</sub>-TRI feed mixtures, respectively. Figure S15 and Figure S 16 illustrate the compositions of the bottom products of the distillations.

Table S15: Bottom product composition and conditions of the distillations of the OME synthesis products from MeOH-pFA feed mixture. The concentrations are presented in mass fractions.

|                                 | A36    | A46    | Dowex  | H-BEA 25 | H-MFI 90 | Nafion |
|---------------------------------|--------|--------|--------|----------|----------|--------|
| FA                              | 0.3845 | 0.4112 | 0.3583 | 0.3943   | 0.3307   | 0.3950 |
| H <sub>2</sub> O                | 0.1020 | 0.1216 | 0.1048 | 0.0980   | 0.1052   | 0.0953 |
| MeOH                            | 0.1924 | 0.1541 | 0.1098 | 0.2056   | 0.2189   | 0.1836 |
| OME <sub>1</sub>                | 0.0444 | 0.0298 | 0.1210 | 0.0383   | 0.0534   | 0.0347 |
| OME <sub>2</sub>                | 0.1029 | 0.0881 | 0.1147 | 0.1103   | 0.1187   | 0.1128 |
| OME <sub>3</sub>                | 0.0636 | 0.0695 | 0.0698 | 0.0648   | 0.0699   | 0.0705 |
| OME <sub>4</sub>                | 0.0427 | 0.0509 | 0.0480 | 0.0407   | 0.0447   | 0.0474 |
| OME <sub>5</sub>                | 0.0233 | 0.0286 | 0.0269 | 0.0206   | 0.0230   | 0.0256 |
| OME <sub>6</sub>                | 0.0139 | 0.0170 | 0.0170 | 0.0113   | 0.0128   | 0.0149 |
| OME <sub>7</sub>                | 0.0079 | 0.0099 | 0.0099 | 0.0061   | 0.0068   | 0.0082 |
| OME <sub>8</sub>                | 0.0045 | 0.0057 | 0.0057 | 0.0034   | 0.0035   | 0.0045 |
| OME <sub>9</sub>                | 0.0026 | 0.0036 | 0.0032 | 0.0019   | 0.0019   | 0.0025 |
| OME <sub>10</sub>               | 0.0015 | 0.0023 | 0.0019 | 0.0011   | 0.0011   | 0.0014 |
| OME <sub>11</sub>               | 0.0009 | 0.0000 | 0.0011 | 0.0007   | 0.0000   | 0.0009 |
| TRI                             | 0.0125 | 0.0078 | 0.0067 | 0.0012   | 0.0018   | 0.0027 |
| MEFO                            | 0.0002 | 0.0000 | 0.0013 | 0.0018   | 0.0077   | 0.0000 |
| m <sub>initial</sub> [g]        | 37.2   | 50.3   | 42.0   | 40.9     | 50.9     | 50.3   |
| m <sub>Distillate</sub> [g]     | 3.8    | 8.1    | 3.2    | 2.5      | 6.6      | 5.5    |
| m <sub>Bottom</sub> [g]         | 32.9   | 41.9   | 38.3   | 38.3     | 43.8     | 44.3   |
| T <sub>Reboiler,max.</sub> [°C] | 90     | 90     | 82     | 87       | 85       | 91     |

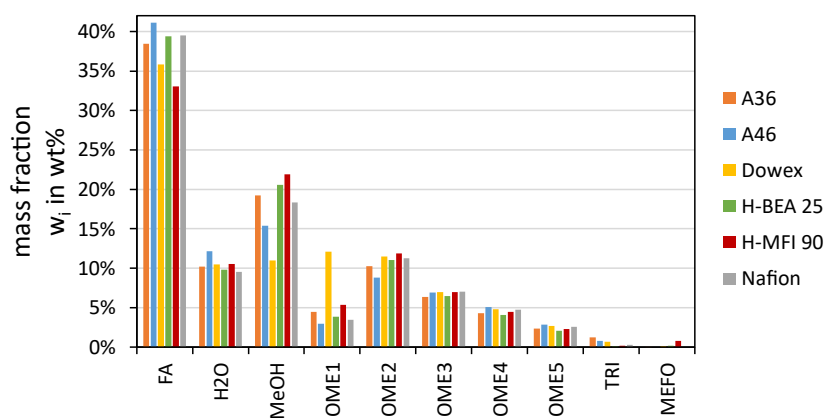

Figure S15 - Bottom product composition and conditions of the distillations of the OME synthesis products from MeOH-pFA feed mixture.

Table S16: Bottom product composition and conditions of the distillations of the OME synthesis products from OME<sub>1</sub>-TRI feed mixture. The concentrations are presented in mass fractions.

|                                 | A36    | A46    | Dowex  | H-BEA 25 | H-MFI 90 | Nafion |
|---------------------------------|--------|--------|--------|----------|----------|--------|
| FA                              | 0.0261 | 0.0172 | 0.0250 | 0.0000   | 0.0000   | 0.0053 |
| H <sub>2</sub> O                | 0.0000 | 0.0000 | 0.0000 | 0.0000   | 0.0000   | 0.0000 |
| MeOH                            | 0.0063 | 0.0100 | 0.0100 | 0.0014   | 0.0015   | 0.0019 |
| OME <sub>1</sub>                | 0.1127 | 0.0348 | 0.3509 | 0.1724   | 0.1538   | 0.0839 |
| OME <sub>2</sub>                | 0.2886 | 0.1287 | 0.2139 | 0.2962   | 0.3132   | 0.2997 |
| OME <sub>3</sub>                | 0.1892 | 0.1763 | 0.1334 | 0.1861   | 0.1969   | 0.1988 |
| OME <sub>4</sub>                | 0.1364 | 0.1862 | 0.0927 | 0.1284   | 0.1319   | 0.1449 |
| OME <sub>5</sub>                | 0.0805 | 0.1403 | 0.0520 | 0.0728   | 0.0718   | 0.0869 |
| OME <sub>6</sub>                | 0.0514 | 0.1057 | 0.0316 | 0.0451   | 0.0423   | 0.0566 |
| OME <sub>7</sub>                | 0.0318 | 0.0745 | 0.0197 | 0.0266   | 0.0240   | 0.0357 |
| OME <sub>8</sub>                | 0.0195 | 0.0498 | 0.0132 | 0.0155   | 0.0133   | 0.0223 |
| OME <sub>9</sub>                | 0.0123 | 0.0336 | 0.0112 | 0.0091   | 0.0075   | 0.0142 |
| OME <sub>10</sub>               | 0.0076 | 0.0225 | 0.0107 | 0.0053   | 0.0043   | 0.0088 |
| OME <sub>11</sub>               | 0.0050 | 0.0155 | 0.0147 | 0.0033   | 0.0026   | 0.0057 |
| TRI                             | 0.0314 | 0.0150 | 0.0302 | 0.0270   | 0.0251   | 0.0340 |
| MEFO                            | 0.0014 | 0.0000 | 0.0008 | 0.0108   | 0.0119   | 0.0014 |
| m <sub>initial</sub> [g]        | 30.4   | 50.3   | 39     | 50.5     | 51.2     | 49.2   |
| m <sub>Distillate</sub> [g]     | 7.1    | 9.0    | 7.0    | 11.5     | 10.3     | 11.8   |
| m <sub>Bottom</sub> [g]         | 23.1   | 40.7   | 30.5   | 38.4     | 40.3     | 37.0   |
| T <sub>Reboiler,max.</sub> [°C] | 80     | 78     | 90     | 77       | 72       | 97     |

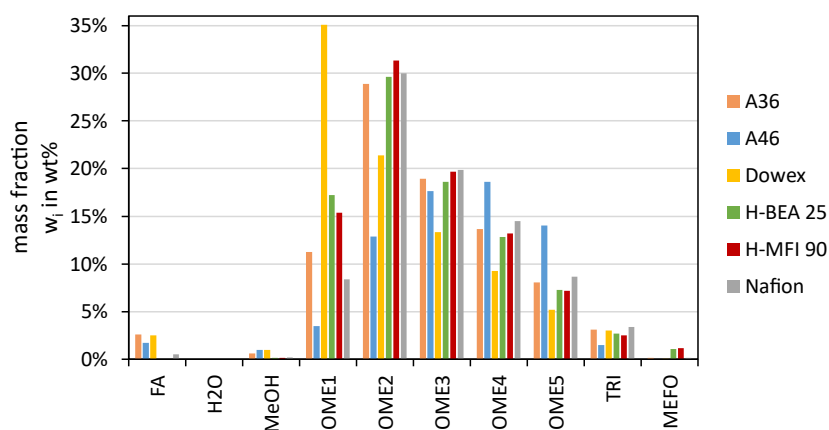Figure S 16 - Bottom product composition and conditions of the distillations of the OME synthesis products from OME<sub>1</sub>-TRI feed mixture.
